# Supplementary material for: Peripheral Arterial Disease in Type 2 Diabetes Is Associated with an Increase in Fibrinogen Levels
Source: Int J Endocrinol. 2018 Nov 8;2018:3709534. doi: 10.1155/2018/3709534 (PMC6250013; doi:10.1155/2018/3709534)
Supplement: Supplementary Materials — Relevant clinical data of the subjects. [file 3709534.f1.xlsx]

## Sheet: data
number	sex	age	PAD	Stroke	Hypertension	Diabetes duration, months	Smoking	Alcohol	Height	Weight	BMI	Waist circumference	Hip circumference	Waist/hip ratio	Fibrinogen	TC	TG	HDL	LDL	HBA1C
1	0	58	1	0	0	12	0	0	163	58	21.83	81	93	0.870968	2.75	3.35	0.7	0.99	1.95	6.5
2	0	79	1	0	0	228	1	0	162	63	24.01	89	91.5	0.972678	5.8	3.47	1.49	0.97	1.9	8.7
3	0	56	0	0	0	24	1	0	169	71	24.86	100	98	1.02041	6.78	3.49	1.62	0.96	1.68	11
4	0	79	0	0	0	96	1	1	175	100	32.65	144	120	1.2	8.27	3.59	1.52	0.95	2.01	5.7
5	0	66	1	0	0	6	1	1	170	80	27.68	108	107	1.00935	3.74	4.11	0.91	0.94	2.5	8
6	0	52	1	0	0	96	0	0	162	71.5	27	91	101	0.90099	4.57	3.68	1	0.94	2.16	7.9
7	0	59	1	0	0	24	1	1	168	83.5	29.6	101	105	0.961905	4.83	4.04	1.24	0.93	2.03	9.7
8	0	67	1	0	0	120	0	0	158	49	19.63	76	85	0.894118	5.15	3.62	0.55	0.91	2.42	8.8
9	0	54	1	0	0	96	0	0	170	51.5	17.8	80	90	0.888889	5.19	3.28	1.17	0.88	1.9	7.9
10	0	66	1	0	0	36	1	1	150	60	26.7	107	96	1.11458	3.12	2.8	0.62	0.82	2	6.4
11	0	71	1	0	0	48	1	0	165	67	24.6	97	103	0.941748	5.08	4.3	1.21	0.79	2.55	10.1
12	0	65	0	0	0	96	1	1	165	71	26.08	91	102	0.892157	6.1	2.5	0.69	0.79	1.7	12.4
15	0	41	1	0	0	48	1	1	169	72.5	25.38	80	90	0.888889	6.31	3.57	1.45	0.65	2.29	9.7
16	0	57	0	0	0	204	0	1	173	62	20.72	88	96	0.916667	2.37	4.18	1.69	0.57	2.1	7.3
17	0	80	1	0	0	240	1	0	164	70	26.03	95	93	1.02151	8.52	2.95	0.75	0.54	2.01	16.6
18	0	74	1	0	0	24	1	0	163	80	30.11	106	123	0.861789	3.35	1.22	0.87	0.35	0.43	7
19	0	32	0	0	0	50	1	1	181	110	33.58	122	114	1.07018	5.06	1.67	1.24	0.2	0.63	10
20	0	43	1	0	1	72	1	1	177	91.5	29.2	96.5	104	0.927885	4.14	3.29	0.81	1.27	1.61	7.6
21	0	56	1	0	1	12	0	0	165	55	20.2	82	87	0.942529	5.35	4.22	1.38	0.99	2.48	9.1
22	0	72	1	0	1	240	1	0	163	55	20.7	76	82	0.926829	3.1	3.81	0.71	0.95	1.98	12.9
23	0	63	1	0	1	72	0	0	177	87	27.77	80	88	0.909091	3.3	2.68	0.79	0.95	1.33	9.6
24	0	61	1	0	1	120	1	0	161	65	25.1	87	95	0.915789	5.47	2.14	0.6	0.95	0.91	7.1
25	0	65	1	0	1	60	0	0	160	62	24.22	88	92	0.956522	2.59	3.69	1.56	0.94	2.07	12.5
26	0	66	1	0	1	12	0	0	158	50	20.03	85	85	1	8.43	3.86	0.98	0.93	2.32	12.5
27	0	58	1	0	1	240	1	1	174	80	26.4	96	100	0.96	2.65	2.17	0.75	0.93	1.16	6.5
28	0	72	1	0	1	240	0	0	170	64	22.15	59	71	0.830986	3.96	3.23	1.23	0.92	1.74	6.1
29	0	48	1	0	1	120	0	0	173	62	20.72	83	92	0.902174	7.23	3.4	1.03	0.91	2.3	8.8
30	0	53	1	0	1	120	0	0	175	66.5	21.7	87	99	0.878788	4.1	2.96	0.79	0.91	1.55	13.7
31	0	62	1	0	1	96	0	0	163	72	27	100	90	1.11111	2.9	2.74	0.91	0.91	1.44	8.2
32	0	91	1	0	1	48	0	0	166	64	23.23	88	94	0.93617	5.07	3.79	1.07	0.9	2.3	9.9
33	0	53	1	0	1	120	1	1	175	88	28.73	103	100	1.03	3.21	2.38	1.04	0.9	0.89	8
34	0	75	1	0	1	240	1	1	168	63	22.32	90	85	1.05882	6.46	3.29	0.81	0.88	1.93	11.3
36	0	77	0	0	1	240	0	0	167	83	29	100	106	0.943396	2.32	3.08	1.24	0.87	1.69	7.3
37	0	80	1	0	1	120	1	0	165	60	22.04	86	95	0.905263	3.12	2.94	0.99	0.87	1.64	7.7
38	0	55	1	0	1	8	1	1	158	50	20	70	81	0.864198	7.79	3.07	0.62	0.85	1.73	8.1
39	0	61	1	0	1	240	1	1	168	81	28.7	99	107	0.925234	4.68	3.88	1.14	0.84	2.49	9.4
40	0	56	1	0	1	240	1	0	167	78	27.97	105	113	0.929204	7.04	3.7	0.76	0.83	2.54	9.2
41	0	50	1	0	1	120	1	1	176	77	24.9	93	94	0.989362	1.88	3.73	0.83	0.83	2.19	11.5
42	0	83	1	0	1	0.5	1	0	160	46	17.97	74	80	0.925	4.28	3.43	1.41	0.83	1.87	10.1
43	0	64	1	0	1	6	1	1	163	59	22.21	89	90	0.988889	2.86	3.63	1.33	0.81	2.17	6.6
44	0	53	1	0	1	84	1	1	172	93	31.44	105	107	0.981308	3.57	2.95	1.31	0.8	1.31	7.2
45	0	85	1	0	1	300	0	0	160	53.5	20.9	98	98	1	3.37	2.66	0.97	0.79	1.44	10.6
46	0	52	1	0	1	120	0	0	166	75	27.5	90	90	1	3.94	3.77	0.9	0.78	2.5	10.3
48	0	52	1	0	1	12	1	1	171	58.5	20.01	84	87	0.965517	3.04	2.66	1.32	0.75	1.32	6.2
49	0	51	1	0	1	0.5	0	1	160	65	25.4	98	91	1.07692	7.21	2.53	1.26	0.75	1.02	10.4
50	0	55	1	0	1	24	0	0	156	63	25.8	94	98	0.959184	3.91	2.11	1.12	0.75	0.89	8.1
52	0	50	1	0	1	180	0	0	176	83	26.79	93	100	0.93	6.46	4.05	1.42	0.73	2.41	7.6
53	0	68	1	0	1	6	0	1	168	68	24.09	90	100	0.9	3.21	2.25	1.2	0.73	1.03	8.4
54	0	54	1	0	1	0.5	1	0	165	69.5	25.5	93	102	0.911765	4.47	3.93	1.49	0.71	2.37	5.9
55	0	65	1	0	1	120	0	0	172	65	21.97	71	68	1.04412	3.23	3.59	1.06	0.7	2.51	6.4
57	0	84	1	0	1	120	0	0	170	58	20.07	75	90	0.833333	8.1	2.47	0.85	0.67	1.29	8
58	0	64	1	0	1	156	1	1	169	70	24.5	91	100	0.91	6.22	2.4	1.28	0.63	1.21	8.3
59	0	70	0	0	1	120	0	0	168	69	24.45	100	110	0.909091	3.83	3.58	1.56	0.53	2.26	5.7
60	0	51	0	0	0	144	1	1	171	76	25.99	94	99	0.949495	5.45	37	0.97	0.67	2.03	9.8
61	0	67	1	0	0	156	0	0	172	65	21.97	83	91	0.912088	3.37	9.68	1.97	0.67	7.09	8.1
62	0	69	1	0	0	252	0	0	164	75	27.89	91	95	0.957895	3.08	9.26	8.89	0.84	2.38	8.3
63	0	64	0	0	0	120	1	0	170	81	28.03	114	100	1.14	2.87	7.77	1.59	1.01	5.5	13.9
64	0	64	1	0	0	60	0	0	165	70	25.71	90	87	1.03448	2.91	7.58	2.37	1.19	5.25	10.9
65	0	36	0	0	0	0.067	0	0	170	71	24.57	91	97	0.938144	5.1	7.48	0.67	1.84	4.51	12.2
67	0	70	1	0	0	120	1	0	165	74	27.18	98	100	0.98	3.36	7.13	2.28	1.46	4.82	11.1
68	0	47	1	0	0	84	0	0	167	63	22.59	92	94	0.978723	2.75	7.1	1.07	1.15	4.91	14.4
69	0	78	0	0	0	120	1	1	170	54	18.69	74	80	0.925	3.03	7.09	1.99	0.9	5.2	9.1
70	0	50	1	0	0	2	1	1	179	80	25	100	105	0.952381	4.1	7.03	4.37	0.83	4.38	12.6
71	0	60	1	0	0	96	1	0	165	78	25.6	87	102	0.852941	3.27	7.01	2.88	1.37	2.69	8.6
72	0	44	1	0	0	36	0	0	175	75	24.49	90	86	1.04651	3.58	7	1.69	1.26	4.69	10.8
73	0	66	1	0	0	96	1	1	160	53	20.7	80	92	0.869565	4.38	6.8	1.34	1.29	5.2	6.2
74	0	87	0	0	0	60	0	0	159	58	22.94	98	98	1	2.72	6.8	1.12	1.79	3.91	10.5
75	0	59	1	0	0	36	1	0	161	60	23.15	96	100	0.96	3.35	6.79	2.28	1.43	3.97	9.9
76	0	52	1	0	0	120	0	0	168	60	21.2	86	91	0.945055	2.63	6.79	1.19	1.34	4.31	6.9
77	0	65	1	0	0	6	1	1	174	72.5	23.95	86	102	0.843137	4.07	6.74	8.8	0.86	1.68	9.6
78	0	42	1	0	0	6	1	0	169	59.5	20.83	80	90	0.888889	2.63	6.62	1.49	1.34	4.67	11.9
79	0	69	0	0	0	204	0	0	165	67	24.6	70	104	0.673077	2.59	6.5	3.94	1.29	4.02	8.2
80	0	62	1	0	0	12	1	1	168	74	26.22	94	95	0.989474	4.83	6.48	1.42	0.84	4.81	10.7
81	0	69	1	0	0	48	1	1	164	60	22.31	75	85	0.882353	3.33	6.41	3.44	1.13	3.98	9.2
82	0	59	1	0	0	120	0	1	168	70	24.8	86	98	0.877551	3.8	6.34	2.14	1.27	3.85	10.5
83	0	57	1	0	0	72	1	1	172	78	26	98	97	1.01031	3.29	6.34	1.2	1.05	4.68	12.9
84	0	48	0	0	0	120	1	1	176	77	24.86	90	99	0.909091	3.11	6.3	1.42	1.32	4.26	10.9
85	0	63	1	0	0	84	1	1	163	70	26.3	80	96	0.833333	3.57	6.3	1.2	1.37	4.06	10.5
86	0	59	0	0	0	156	0	0	164	60	22.31	89	94	0.946809	2.58	6.25	1.39	0.94	4.32	10.7
87	0	73	1	0	0	156	0	0	162	78	29.72	100	94	1.06383	1.95	6.18	5.24	1.15	1.91	9
88	0	69	1	0	0	120	0	0	168	59	20.9	78	90	0.866667	3.18	6.12	0.96	1.09	4.44	10.2
89	0	62	0	0	0	240	0	0	173	78	26	103	99	1.0404	2.63	5.99	1.36	1.31	3.65	10.5
91	0	61	1	0	0	6	0	1	162	65	24.77	92	99	0.929293	3.41	5.81	1.69	0.98	3.86	7.5
92	0	48	1	0	0	180	1	1	174	74	24.44	92	100	0.92	1.84	5.77	3.82	0.93	2.67	9.7
93	0	62	1	0	0	48	1	1	163	53	19.9	76	86	0.883721	2.88	5.76	2.4	0.99	3.9	8.9
94	0	37	1	0	0	0.5	0	1	176	76	24.54	90	97	0.927835	4.68	5.76	1.26	1.05	4.08	10
95	0	58	1	0	0	240	1	0	163	83	31.2	109	105	1.0381	3.86	5.69	1.69	0.99	3.6	7.9
96	0	49	0	0	0	120	1	1	172	70	23.66	84	85	0.988235	2.74	5.69	1.15	1.45	3.71	8.1
97	0	60	0	0	0	12	0	0	168	76	26.9	96	91	1.05495	2.03	5.69	0.92	1.66	3.35	7.5
98	0	55	0	0	0	72	1	1	170	75	25.95	95	101	0.940594	2.81	5.57	1.67	1.02	4.1	12.7
100	0	70	1	0	0	168	0	0	167	69	24.7	91.5	95.5	0.958115	2.05	5.5	2.41	0.89	3.58	11.1
101	0	87	0	0	0	240	0	0	153	70	29.9	92	99	0.929293	3.42	5.48	1.66	1.28	3.65	12.3
102	0	74	1	0	0	60	0	0	166	63	22.86	68	77	0.883117	6.97	5.48	0.94	1.25	3.39	10.6
103	0	59	1	0	0	180	1	1	177	80	25.54	91	98	0.928571	3.74	5.47	2.31	0.85	3.74	7
104	0	77	0	0	0	48	0	0	163	71	26.72	98	94	1.04255	3.02	5.44	4.12	1.21	2.46	8.9
106	0	63	0	0	0	0.67	1	1	163	61	22.96	86	94	0.914894	2.88	5.4	0.77	1.88	2.83	9.4
108	0	65	0	0	0	48	0	0	158	55	22.03	74	86	0.860465	3.94	5.37	3.77	0.97	3.13	5.8
109	0	63	0	0	0	240	0	1	172	76	25	106	100	1.06	2.41	5.35	1.12	0.95	3.28	5.6
110	0	70	1	0	0	240	0	0	170	60	20.76	90	91	0.989011	3.15	5.35	1.08	1.37	3.28	9.3
111	0	55	0	0	0	180	0	1	180	99	30.56	110	113	0.973451	4.26	5.34	1.67	0.81	3.6	6.8
113	0	54	1	0	0	84	1	1	165	71	26	91	98	0.928571	3.66	5.34	1.32	1.34	3.04	7.8
114	0	45	1	0	0	120	0	0	170	85	29.41	104	103	1.00971	2.66	5.2	1.03	1.45	3.05	7
115	0	46	0	0	0	96	1	0	178	92	29.04	95	100	0.95	3.29	5.2	0.79	2.25	2.61	11.1
116	0	44	1	0	0	84	1	0	170	80	27.68	100	88	1.13636	3.03	5.17	3.87	0.75	2.51	9
117	0	46	1	0	0	84	0	0	166	65	23.59	92	97	0.948454	2.88	5.16	1.7	0.98	3.32	9.2
118	0	46	1	0	0	60	0	0	169	65	22.76	90	82	1.09756	2.75	5.16	1.51	0.87	3.55	11.3
119	0	64	1	0	0	120	0	1	155	73	30.39	85	95	0.894737	3.21	5.15	1.64	1.16	3.07	12.2
120	0	40	0	0	0	0.5	0	0	164	65	24.17	102	105	0.971429	2.73	5.12	1.02	1.12	3.15	9.2
121	0	34	1	0	0	12	0	0	165	61	22.41	85	89	0.955056	3.44	4.56	6.39	0.75	1.46	10
122	0	76	0	0	0	24	1	0	168	62	21.97	91	95	0.957895	2.39	4.64	4.56	0.93	1.73	10.1
123	0	37	1	0	0	72	0	0	175	62.5	20.41	82	88	0.931818	3.17	4.88	3.97	0.78	2.25	11
124	0	68	0	0	0	1	1	1	158	50	20.03	79	90	0.877778	2.46	4.4	3.81	0.7	2.5	7.5
125	0	57	1	0	0	60	0	0	166	72	26.13	105	112	0.9375	3.33	4.8	2.98	0.79	2.6	7.6
126	0	48	1	0	0	156	0	0	166	60	21.78	85	90	0.944444	3.77	4.62	2.78	1.21	2.41	8.8
127	0	61	1	0	0	120	0	0	175	65	21.22	90	95	0.947368	1.95	4.7	2.7	0.93	2.8	8
128	0	52	0	0	0	182	0	0	178	62	19.57	76	93	0.817204	3.36	4.44	2.7	0.75	2.57	7.5
130	0	57	1	0	0	108	1	0	180	70.5	21.76	86	93	0.924731	5.71	3.17	2.29	0.57	1.76	10.9
131	0	41	1	0	0	96	0	0	163	75	28.23	82	80	1.025	5.19	3.06	2.27	0.56	1.46	12.9
132	0	62	1	0	0	240	1	0	171	71	24.28	97	99	0.979798	2.76	3.73	2.17	1.48	2.13	6.9
133	0	60	1	0	0	60	1	0	160	55	21.48	80	87	0.91954	3.54	3.85	2.16	0.71	2.25	9
134	0	61	1	0	0	12	1	0	170	70	24.22	100	101	0.990099	4.01	4.14	2.12	1.29	2.08	6.3
135	0	55	1	0	0	240	1	1	166	66	24	90	88	1.02273	4.31	4.99	2.06	0.91	2.59	6.2
136	0	69	1	0	0	120	0	0	166	76.5	27.7	94	94	1	3.43	4.67	1.99	1.34	2.35	7
137	0	53	1	0	0	72	0	0	175	83	22.3	101	102	0.990196	8.44	4.39	1.97	0.81	2.5	7.7
138	0	69	1	0	0	60	1	1	170	63	21.7	82	85	0.964706	2.81	4.1	1.95	1.05	2.29	7.2
139	0	67	1	0	0	108	1	0	165	75	27.55	94	94	1	3.33	4.79	1.93	0.92	2.89	7.4
141	0	65	1	0	0	12	0	1	172	74	25.01	85	90	0.944444	3.14	3.24	1.9	0.68	1.87	7.1
142	0	66	1	0	0	168	1	0	161	74.5	28.7	94	101	0.930693	5.22	4.98	1.82	1.18	3.04	9.4
143	0	70	1	0	0	0.167	1	0	183	93	27.77	112	98	1.14286	4.15	3.6	1.82	0.91	2	9.2
144	0	55	0	0	0	240	1	1	163	51	19.2	75	79	0.949367	6.03	4.4	1.81	0.9	2.55	8.4
145	0	44	1	0	0	72	1	0	163	66	24.84	94	94	1	4.57	3.28	1.79	0.83	1.76	8.4
146	0	48	1	0	0	24	0	0	178	86	27.14	85	95	0.894737	4.1	4.1	1.75	1.56	1.69	10.9
147	0	61	0	0	0	192	0	0	179	88	27.46	85	90	0.944444	4.13	4.85	0.86	0.71	3.57	11.8
148	0	75	1	0	0	324	1	1	158	58	23.2	88	96	0.916667	3.1	5.07	1.06	1.23	3.49	10.6
149	0	51	1	0	0	240	0	0	170	77.5	26.8	88	94	0.93617	3.55	4.76	1.27	0.87	3.41	10.4
150	0	52	1	0	0	120	0	0	173	73	24.39	97	99	0.979798	4.9	4.83	1.38	0.82	3.34	10.9
151	0	54	1	0	0	0.5	0	0	175	77	25.14	93	98	0.94898	5.45	4.47	1.49	0.79	3.22	6.6
152	0	65	1	0	0	240	1	0	161	61.5	23.73	92	96	0.958333	3.03	4.5	1.21	1.11	3.2	10.8
153	0	58	1	0	0	168	0	1	157	80	32.5	102	98	1.04082	4.51	4.64	0.98	0.99	3.15	9.8
154	0	56	1	0	0	60	0	0	167	67	24.02	93	98	0.94898	6.33	4.76	1.57	0.62	3.11	9.4
156	0	60	1	0	0	132	1	1	170	70.5	24.39	97	102	0.95098	4.12	4.76	1.63	0.81	3.03	11.6
157	0	75	0	0	0	84	1	0	167	90	32.37	108	104	1.03846	2.98	4.16	1.54	0.97	2.94	10.7
158	0	67	1	0	0	120	1	1	172	75	25.3	100	102	0.980392	3.69	4.66	1.21	0.85	2.9	9.5
159	0	61	0	0	0	5	0	0	159	72	28	95	90	1.05556	4.27	4.67	1.67	0.8	2.89	12
160	0	38	1	0	0	48	1	1	180	65	20.06	84	92	0.913043	3.47	4.23	0.82	1.02	2.88	9.9
161	0	53	1	0	0	240	1	0	169	67.5	23.63	101	100	1.01	2.84	4.68	1.06	1.24	2.85	12.8
162	0	74	1	0	0	144	0	0	170	68	23.53	84	96	0.875	7.09	4.6	0.8	1.06	2.8	7.8
163	0	69	1	0	0	240	0	0	167	72	25.8	92	94	0.978723	2.98	4.48	1.65	1.12	2.78	6.9
164	0	58	1	0	0	211	1	0	165	65.5	24.06	96	91	1.05495	2.87	4.71	1.47	1.16	2.77	6.1
165	0	59	1	0	0	120	1	0	167	67	24.02	80	94	0.851064	3.72	4.79	0.64	1.61	2.74	8.7
166	0	62	0	0	0	144	0	0	151	56	24.56	85	86	0.988372	3.02	4.72	1.46	1.25	2.69	7.5
167	0	54	1	0	0	96	1	1	168	68	24.09	95.5	95.5	1	2.21	4.77	0.94	1.52	2.67	7.1
168	0	53	1	0	0	60	1	0	172	64	21.63	81	96	0.84375	2.68	4.7	0.58	1.32	2.66	7.1
169	0	53	1	0	0	1	0	0	160	62.5	24.4	70	73	0.958904	3.8	4.76	1.52	1.12	2.64	10
170	0	54	0	0	0	180	1	1	177	74	23.62	90	105	0.857143	2.9	4.35	1.08	1.05	2.64	11.4
171	0	71	1	0	0	240	1	1	176	79	25.5	94	104	0.903846	2.4	3.94	0.67	0.8	2.64	7.9
172	0	58	0	0	0	120	1	1	168	65	23.03	88	92	0.956522	2.24	4.8	0.68	2.42	2.3	10.4
173	0	66	1	0	0	300	0	0	168	73	25.86	103	101	1.0198	3.94	5	1.1	1.85	2.41	7
174	0	67	0	0	0	204	0	0	165	75	27.55	100	100	1	4.11	4.1	0.49	1.77	2	9.4
177	0	76	0	0	0	12	0	0	170	82	28.37	75	86	0.872093	2.65	4.17	0.55	1.62	2.04	7.4
178	0	41	1	0	0	84	1	1	167	63	22.59	87	92	0.945652	2.27	3.87	0.56	1.54	2.14	7
180	0	62	0	0	0	120	1	0	170	70	24.22	88	98	0.897959	2.22	3.33	0.45	1.48	1.8	14.8
181	0	74	1	0	0	72	0	0	150	52.5	23.3	70	92	0.76087	1.94	4.92	1.52	1.46	2.59	10.9
182	0	52	0	0	0	0.67	0	1	172	66	22.31	83	96	0.864583	3.48	4.27	0.83	1.45	2.49	7.4
184	0	46	1	0	0	168	0	0	168	77.5	27.46	96	96	1	5.91	3.52	0.66	1.35	1.5	11.5
185	0	89	1	0	0	480	0	0	155	68	28.3	102.5	101	1.01485	4.07	4.04	1.21	1.34	1.97	6.7
186	0	63	1	0	0	24	1	1	165	61.5	22.59	87	89	0.977528	2.51	4.5	1.57	1.31	2.36	9.3
187	0	57	0	0	0	12	1	0	164	61	22.68	82	91	0.901099	2.83	3.8	1.36	1.29	2.1	9.9
188	0	65	1	0	0	96	1	1	167	64	22.95	89	93	0.956989	4.88	3.7	0.57	1.26	2.21	9.7
189	0	86	1	0	0	144	0	0	170	55	19			#DIV/0!	4.2	3.67	0.66	1.26	1.76	7.3
190	0	68	1	0	0	120	1	1	169	61	24.1	75	86	0.872093	2.2	3.77	0.7	1.23	2.13	7.8
191	0	76	1	0	0	96	1	1	159	78	30.85	114	110	1.03636	5.79	3.04	1.03	1.22	1.48	7.2
192	0	71	1	0	0	96	0	0	165	67	24.61	95	105	0.904762	6.72	3.95	1.16	1.21	2.03	8.3
193	0	50	1	0	0	132	1	0	167	70	25.1	92	96	0.958333	3.96	3.11	1.09	1.2	1.7	15.1
194	0	76	1	0	0	120	1	0	167	64	22.95	86	91	0.945055	3.47	2.99	0.63	1.19	1.62	7
195	0	51	1	0	0	6	0	0	176	78	25.18	87	95	0.915789	3.06	3.7	1.24	1.16	1.96	9.6
196	0	50	0	0	0	240	1	1	174	65	21.47			#DIV/0!	2.96	3.15	1.01	1.16	1.76	15.9
198	0	65	0	0	0	72	0	0	160	62	24.22	88	95	0.926316	2.45	3.39	0.88	1.1	1.96	6.5
199	0	65	0	0	0	120	1	1	170	64	22.1	86	91	0.945055	2.52	4.13	1.22	1.09	2.2	9.1
200	0	49	1	0	0	120	0	0	162	72	27.43	99	106	0.933962	5	2.48	0.65	1.09	1.08	8.6
202	0	62	1	0	0	12	1	1	170	62	21.45	96	116	0.827586	5.1	3.55	0.69	1.06	2.24	9.4
204	0	46	1	0	0	60	0	1	169	76	26.61	100	96	1.04167	2.6	4.11	1.42	1.03	2.58	10.2
205	0	68	1	0	0	144	0	0	165	55	20.2	86	86	1	8.03	3.92	1	1.03	2.12	10.3
207	0	55	1	0	0	60	1	1	164	80.5	29.9	104	100	1.04	3.7	3.33	0.64	1	1.91	8.1
208	0	45	1	0	0	24	1	1	170	57	19.72	80	90	0.888889	7.53	4.03	1.64	0.88	2.56	8.1
209	0	45	1	0	0	96	1	1	168	74	26.22	92	94	0.978723	4.09	3.22	1.64	0.77	1.43	6.7
210	0	75	1	0	0	120	1	0	172	61	20.62	87	96	0.90625	2.7	8.49	1.69	1.19	5.86	9.9
211	0	77	1	0	1	120	0	0	160	52	20.31	87	94	0.925532	4.78	3.79	1.52	1.02	2.32	10.2
212	0	54	1	0	1	12	1	1	170	63	21.8	87	94	0.925532	5.1	16.18	1.55	1.07	11.33	12.9
213	0	64	1	0	1	180	0	0	170	76	26.2	95	100	0.95	4.57	8.66	2.17	1.91	5.83	10.9
214	0	36	1	0	1	1	1	0	170	58	20.07	83	98	0.846939	5.63	8.65	1.73	1.71	5.9	14
215	0	54	0	0	1	60	0	0	164	56	20.82	80	90	0.888889	3.36	7.86	1.9	1.22	5.05	6.6
217	0	44	1	0	1	132	1	0	165	69	25.34	92	97	0.948454	3.23	7.62	1.47	1.56	5.46	10.2
218	0	75	1	0	1	120	0	0	160	64	25	86	94	0.914894	3.51	7.38	2.79	1.13	4.84	10
219	0	67	1	0	1	120	1	0	157	52	21.1	76	88	0.863636	1.72	7.27	7.27	1.1	3.47	6.3
220	0	63	1	0	1	84	1	0	180	75	23.14	85	98	0.867347	4.45	7.21	0.89	1.24	4.78	8.9
221	0	71	1	0	1	24	1	0	173	71	23.72	93	100	0.93	4.93	6.93	1.54	0.95	4.74	11.7
222	0	70	1	0	1	1	1	1	162	63.5	24.2	85	94	0.904255	4.1	6.86	1.9	1.23	4.74	5.9
223	0	39	1	0	1	6	0	1	175	73	23.84	83	87	0.954023	5.59	6.83	0.64	1.43	4.93	15.1
224	0	49	1	0	1	4	1	1	166	73	26.49	105	110	0.954545	2.99	6.75	3.19	0.96	3.67	10.2
225	0	60	1	0	1	120	1	1	170	66	22.8	88	100	0.88	4.53	6.66	2.79	0.84	3.93	7.7
226	0	57	1	0	1	60	1	1	158	65	26.04	96	98	0.979592	2.96	6.42	1.73	0.96	4.38	7.9
227	0	50	1	0	1	0.25	1	0	167	75	35.2	90	90	1	3.93	6.39	3.24	0.69	3.5	7.3
228	0	36	1	0	1	180	1	1	172	93.5	31.6	104	102	1.01961	4.86	6.38	3.87	0.83	3.08	6.4
229	0	71	1	0	1	120	1	0	165	73.5	27	98	88	1.11364	3.31	6.36	1.72	1.14	3.89	6.6
230	0	58	1	0	1	132	0	1	170	68	23.53	88	100	0.88	4.96	6.31	1.78	0.84	4.13	8.7
232	0	36	1	0	1	180	0	0	158	46	18.42	84	89	0.94382	3.85	6.27	5.21	1.03	2.37	11.9
233	0	84	1	0	1	120	1	0	170	72	24.9	95	100	0.95	3.87	6.24	3.28	0.95	3.57	9.4
234	0	65	0	0	1	120	0	0	168	65	23.03	86	98	0.877551	5.55	6.23	2.5	0.93	4.61	13.6
236	0	68	1	0	1	96	1	0	168	73	25.86	97	95	1.02105	5.53	6.16	1.61	0.8	4.2	7.4
237	0	51	1	0	1	2	1	0	166	62	22.5	90	98	0.918367	2.95	6.12	2.04	0.94	4.08	11.6
238	0	67	1	0	1	60	0	0	169	69	24.16	85	93	0.913978	5.16	6.11	0.64	1.52	3.67	14.1
239	0	75	0	0	1	60	0	0	158	53	21.23	75	90	0.833333	2.51	6.1	4.76	1.14	3.04	11.5
240	0	55	1	0	1	120	0	1	163	63.5	23.9	80	85	0.941176	5.31	6.08	1.65	0.98	3.84	8
241	0	54	0	0	1	96	0	0	170	72	24.91	95	97	0.979381	3.49	6.03	1.67	1.19	3.79	9.9
242	0	75	1	0	1	36	0	0	163	70	26.35	89	97	0.917526	4.96	6	2.93	0.7	4.2	7.6
243	0	75	0	0	1	120	1	1	162	63	24.01	90	98	0.918367	3.68	5.99	3.67	0.98	3.68	10.9
244	0	47	1	0	1	0.067	0	1	170	73	25.26	89	90	0.988889	4.04	5.92	1.88	1.13	3.63	12.1
245	0	68	1	0	1	96	0	0	163	57	21.45	86	95	0.905263	3.31	5.9	2.57	1.21	3.19	6.9
246	0	72	1	0	1	96	0	1	153	69	29	92	97	0.948454	3.04	5.84	2.29	1.28	3.59	10.2
247	0	48	1	0	1	0.1	1	0	170	65	22.49	81	90	0.9	4.7	5.82	1.81	0.99	3.87	10.5
248	0	84	1	0	1	96	0	0	171	60	20.52	92	97	0.948454	5.22	5.82	1.33	1.11	3.54	6.8
249	0	73	1	0	1	360	1	1	176	75	24.21	105	115	0.913043	4.39	5.81	2.44	1.07	3.16	8.6
250	0	28	1	0	1	10	0	0	168	68	24.09	76	93	0.817204	4.1	5.8	2.19	1.11	4.4	7.6
251	0	50	1	0	1	0.3	1	0	165	69	25.34			#DIV/0!	2.48	5.77	1.34	1.29	3.56	9.1
252	0	62	1	0	1	6	1	0	156	59	24.24	80	82	0.97561	2.45	5.73	1.43	1.22	3.54	6.8
253	0	72	1	0	1	144	1	0	167	65	23.31	86	93	0.924731	3.21	5.72	1.48	1.57	3.36	12.9
254	0	79	1	0	1	252	0	0	165	59	21.67	92	110	0.836364	3.86	5.7	1.05	1.41	4.3	7
255	0	47	1	0	1	96	0	0	164	53.5	19.89			#DIV/0!	5.51	5.66	1.47	1.14	3.78	6.6
256	0	75	1	0	1	36	1	1	166	79.5	28.9	100	95	1.05263	5.52	5.63	1.09	0.67	4.12	8.6
257	0	54	0	0	1	120	1	1	172	60	20.28	75	85	0.882353	4.47	5.61	2.4	1.26	3.12	13.8
258	0	40	1	0	1	1	1	1	172	76	25.69	92	99	0.929293	8.18	5.6	2.29	1.08	3.6	10.4
259	0	72	1	0	1	180	0	0	172	67	22.65	82	86	0.953488	3.65	5.59	2.1	1.22	3.63	9.4
260	0	66	1	0	1	120	1	0	175	83.5	27.27	102	105	0.971429	3.74	5.59	1.49	1.18	3.48	9.7
261	0	91	1	0	1	96	0	0	165	65	23.88	104	95	1.09474	2.55	5.59	1.35	1.22	3.32	9.7
262	0	84	1	0	1	60	0	0	176	75	24.21	90	100	0.9	7.45	5.57	3.14	0.83	2.64	7.7
263	0	67	1	0	1	180	0	0	169	78	27.31	100	115	0.869565	3.29	5.57	0.64	1.31	3.75	8.1
264	0	64	1	0	1	120	1	1	170	73	25.26	102	90	1.13333	2.65	5.55	2.11	1.16	4.13	8.7
265	0	57	0	0	1	2	0	0	165	62.5	23	85	94	0.904255	2.82	5.52	2.01	1.23	3.11	7.1
266	0	69	1	0	1	120	0	0	164	59	21.94	80	93	0.860215	2.59	5.51	2.62	0.99	3.31	8
267	0	57	1	0	1	192	1	1	168	69.5	24.62	94	93	1.01075	2.85	5.49	1.68	1.1	3.38	10.2
268	0	62	1	0	1	120	1	1	170	86	28.8	100	103	0.970874	4.87	5.48	9.38	0.76	1.44	8.3
269	0	81	1	0	1	10	1	1	160	64	25	67	86	0.77907	4.55	5.48	4.29	0.67	2.79	6.9
270	0	60	1	0	1	60	1	0	171	73	24.96	103	100	1.03	3.66	5.47	2.07	1.02	3.56	9.1
271	0	68	1	0	1	84	0	0	167	52	18.65	75	84	0.892857	3.51	5.47	1.72	1.12	3.55	17
273	0	48	1	0	1	120	1	1	170	67	23.18	58	71	0.816901	4.64	5.4	2.31	0.82	3.35	10.9
274	0	66	1	0	1	3	0	0	177	69	22.02	91	95	0.957895	2.4	5.4	0.83	1.78	4	6.1
275	0	84	1	0	1	24	0	0	175	51	16.65	80	88	0.909091	4.38	5.39	1.56	0.98	3.79	6.3
276	0	85	1	0	1	36	0	0	160	69	26.95	108	100	1.08	5.55	5.38	0.75	1.08	3.66	6.6
277	0	57	1	0	1	120	1	0	170	74	25.6	90	95	0.947368	3.76	5.37	8.66	0.78	1.78	10.1
278	0	78	1	0	1	216	0	0	160	72	28.1	101	99	1.0202	3.84	5.36	1.36	1.2	3.21	6.7
279	0	67	1	0	1	48	1	0	160	61	23.83	88	86	1.02326	5.96	5.35	4.16	0.69	2.67	8.5
280	0	54	1	0	1	84	1	0	178	82	25.9	95	95	1	4.75	5.35	2.3	0.79	3.27	7.3
281	0	30	0	0	1	60	0	1	159	62	24.52	98	102	0.960784	2.68	5.33	3.82	0.93	2.74	12.7
282	0	60	1	0	1	120	0	0	167	82.5	29.58	107	95	1.12632	3.11	5.29	1.21	1.68	2.85	6.8
283	0	62	0	0	1	5	0	0	165	61.5	22.6	83	93	0.892473	2.79	5.28	2.34	1.07	3.09	7.9
285	0	66	0	0	1	120	0	0	175	69	22.5	86	92	0.934783	3.25	5.27	1.18	1.83	2.59	9.3
286	0	53	1	0	1	2	0	0	170	60	20.8	92	92	1	5.19	5.23	1.85	0.9	3.11	6.5
287	0	55	1	0	1	2	0	0	168	62	21.97	97	100	0.97	4.07	5.23	1.66	0.89	3.58	7.2
288	0	21	0	0	1	24	0	0	178	98	30.93	109	110	0.990909	4	5.2	2.1	1.14	3.4	10.6
289	0	62	1	0	1	84	1	0	167	71	25.46	91	95	0.957895	5.37	5.2	1.73	1.28	3.5	7.7
290	0	53	1	0	1	0.5	0	1	165	68	24.98	86	92	0.934783	3.55	5.17	2.63	1.07	2.91	7.9
291	0	55	1	0	1	60	1	0	160	49	19.14	69	80	0.8625	3.91	5.16	3.3	1.02	2.97	9
292	0	68	1	0	1	36	0	0	151	48.5	21.27	85	86	0.988372	3.66	5.12	1.47	0.76	3.64	7.6
293	0	51	1	0	1	120	0	0	175	73	22.3	98	99	0.989899	5.86	5.1	2.99	0.64	2.98	7.3
294	0	75	1	0	1	72	1	1	167	74	26.53	82	90	0.911111	2.94	5.1	1.96	0.99	3.9	10.5
295	0	67	1	0	1	84	0	0	168	84	29.76	80	90	0.888889	3.17	5.1	1.7	0.91	3.43	7.7
297	0	69	1	0	1	120	0	1	160	56	21.88	86	93	0.924731	8.88	5.1	0.89	1.06	3.14	13.4
298	0	60	1	0	1	120	1	1	173	66	22.05	94	95	0.989474	5.02	5.08	2.29	1.07	3	9.7
299	0	75	1	0	1	0.1	1	1	170	61	21.11	85	97	0.876289	4.01	5.08	1.93	0.92	3.25	6.8
300	0	59	1	0	1	192	0	0	162	63.5	24.2	87	91	0.956044	2.88	5.08	1.57	0.9	3.25	9.7
301	0	52	0	0	1	120	0	0	162	58	22.1	86	94	0.914894	3.04	4.46	5.2	0.77	1.46	10.4
302	0	59	1	0	1	120	1	0	173	81	27.06	101	92	1.09783	2.72	4.14	4.94	0.71	1.44	10.4
303	0	57	1	0	1	240	0	0	170	76	26.2	99	98	1.0102	3.52	4.1	4.76	0.83	1.9	8.4
304	0	55	1	0	1	120	1	1	169	73	25.56	95	100	0.95	4.24	3.9	4.16	0.93	1.5	7.8
305	0	51	1	0	1	192	1	0	173	78	26.06	94	102	0.921569	3.7	4.58	4.13	1.17	2.5	6.6
306	0	82	1	0	1	96	0	0	152	53	22.94	90	94	0.957447	3.69	3.52	3.43	0.68	1.47	6.8
307	0	60	0	0	1	120	0	0	160	66.5	25.98	88	98	0.897959	2.75	3.77	3.38	0.91	1.89	6.9
308	0	60	1	0	1	36	1	1	170	74	25.6	99	101	0.980198	4.51	4.97	3.32	1.02	2.51	12.5
309	0	56	1	0	1	120	0	0	171	65	22.23	100	105	0.952381	3.3	3.71	3.17	0.82	1.61	9
310	0	78	1	0	1	120	0	0	165	59.5	21.85	95	105	0.904762	3.41	4.92	3.11	0.82	2.56	8.9
311	0	50	1	0	1	72	1	1	176	85	27.44	96	100	0.96	2.98	4.89	3.07	1.24	2.73	7.9
312	0	62	1	0	1	60	0	0	155	64	26.64	90	97	0.927835	3.44	4.52	3	0.64	2.72	7.8
313	0	74	1	0	1	240	0	0	171	64	21.89	86	95	0.905263	3.23	4.65	3	0.89	2.05	10.8
314	0	61	1	0	1	36	1	0	170	75	26	97	98	0.989796	4.07	4.83	2.84	1.05	2.55	8.3
315	0	70	1	0	1	84	1	0	171	71	24.28	84	95	0.884211	3.24	4.53	2.8	0.71	2.4	8.5
316	0	58	1	0	1	180	0	1	160	56.5	22	82	91	0.901099	3.4	4.85	2.7	1.35	2.45	11
317	0	38	0	0	1	216	1	0	175	59	19.27	75	90	0.833333	3.83	2.98	2.67	0.78	1.42	5.7
318	0	51	0	0	1	120	0	1	172	88	29.7	102	100	1.02	2.88	4.85	2.65	0.89	2.62	7.1
320	0	54	1	0	1	120	1	1	172	75	25.3	88	92	0.956522	3.07	4.82	2.6	0.81	3.24	11
321	0	67	1	0	1	132	1	0	156	57	23.42	93	93	1	2.94	4.7	2.6	1.19	2.6	13.6
322	0	47	1	0	1	3	0	0	172	65	21.97	86	89	0.966292	2.41	4.8	2.59	0.9	3.2	10.5
323	0	53	1	0	1	180	1	1	173	83	27.73	103	109	0.944954	5.65	4.96	2.44	0.87	2.89	8.8
324	0	68	1	0	1	240	0	0	172	75	25.4	115	99	1.16162	4.1	4.18	2.42	0.88	2.2	9.7
325	0	56	1	0	1	120	0	0	169	64	22.4	82	86	0.953488	3.67	4.46	2.38	0.84	2.75	7.2
326	0	52	1	0	1	168	1	1	166	97	35.2	127	124	1.02419	2.28	3.01	2.38	0.6	1.52	9
327	0	63	1	0	1	7	0	0	167	77	27.6	111	98	1.13265	7.43	3.53	2.36	1.01	1.7	8
328	0	58	1	0	1	120	1	0	164	78	29	91	90	1.01111	4.83	4.63	2.35	1.48	2.39	9
329	0	51	1	0	1	120	1	0	175	75	23.5	105	100	1.05	1.89	4.83	2.34	0.96	2.59	9.7
330	0	46	1	0	1	24	0	0	171	59	20.18	77	81	0.950617	3.91	4.39	2.27	1.48	2.3	6.9
331	0	72	0	0	1	168	0	1	159	58	23	89	91	0.978022	5.26	4.66	2.21	1.28	2.26	9.5
332	0	38	1	0	1	36	1	0	165	63	23.14	79	91	0.868132	3.91	2.83	2.18	1.15	1.11	7.3
333	0	61	1	0	1	120	1	1	163	63	23.71	83	90	0.922222	3.11	4.66	2.16	0.97	2.94	7.8
334	0	59	1	0	1	96	1	0	173	70	23.39	80	84	0.952381	5.38	3.3	2.16	0.78	1.66	6.7
335	0	54	1	0	1	0.1	1	1	178	85	26.8	97	102	0.95098	3.11	3.4	2.15	1.12	1.58	8.5
336	0	48	1	0	1	120	0	0	164	67.5	25.1	100	100	1	3.42	2.8	2.15	0.61	1.25	9.6
337	0	53	1	0	1	60	1	1	165	65	23.9			#DIV/0!	3.43	5.05	2.13	0.84	2.85	9.9
338	0	57	1	0	1	12	1	0	163	61	23	85	94	0.904255	2.45	4.99	2.12	0.92	3.03	10.7
339	0	59	0	0	1	120	1	1	173	83	27.73	100	110	0.909091	3.01	3.55	2.12	0.87	1.79	7
340	0	50	1	0	1	192	0	0	168	64	22.68	86	95	0.905263	3.76	3.81	2.11	1.1	1.83	11.2
341	0	65	1	0	1	2	1	0	181	75.5	23.05	84	91	0.923077	5.45	4.54	2.08	0.72	3.29	11.2
342	0	38	1	0	1	84	1	1	177	78	24.9	92	99	0.929293	2.89	4.81	2.08	0.87	2.64	9.5
343	0	78	0	0	1	60	0	0	178	71	22.41	89	91	0.978022	3.17	3.6	2.08	0.84	1.96	10.2
344	0	60	1	0	1	156	1	1	166	67	24.31	91	95	0.957895	3.66	4.29	2.08	1.09	1.22	9.8
345	0	43	1	0	1	24	1	1	170	77	26.64	86	94	0.914894	2.25	4.5	2.05	0.91	2.63	7.1
346	0	70	0	0	1	120	1	1	164	65	24.17	96	96	1	4.81	3.65	2.05	0.63	2.19	8.7
347	0	60	1	0	1	216	0	1	172	74	25.01	85	95	0.894737	3.57	3.46	2.03	0.67	2.09	8.1
348	0	79	1	0	1	288	0	0	172	100	33.8	130	121	1.07438	4.59	4.75	2.02	1.32	2.75	9.9
349	0	59	1	0	1	72	1	0	175	56.5	18.45	80	89	0.898876	2.34	3.9	2.02	0.85	2.6	10
350	0	74	1	0	1	120	0	0	165	60.5	22.22	87	97	0.896907	2.85	3.65	1.99	0.81	2.01	9.7
351	0	75	1	0	1	12	1	0	162	78	29.72	90	99	0.909091	4.46	4.55	1.96	0.74	3.21	8.3
352	0	66	0	0	1	120	0	0	152	52	22.5	71	84	0.845238	3.84	3.31	1.96	0.84	1.59	9.5
353	0	44	1	0	1	120	0	1	170	67	23.18	82	89	0.921348	5.22	2.99	1.95	0.67	1.6	7.4
354	0	55	1	0	1	120	0	0	168	78	27.64	95	100	0.95	2.59	3.64	1.94	0.95	1.81	6.2
355	0	49	1	0	1	120	1	1	164	78	29	102	106	0.962264	4.07	3.71	1.9	0.78	2.18	7.1
356	0	66	0	0	1	2	1	1	167	67	24	94	104	0.903846	4.53	3.96	1.89	0.65	2.74	11
357	0	40	1	0	1	120	0	0	170	64	22.15	84	93	0.903226	4.14	4.09	1.89	1.1	1.88	10.7
358	0	58	1	0	1	12	1	1	166	51	18.51	72	83	0.86747	4.02	4.21	1.87	0.6	2.59	8.9
359	0	57	1	0	1	36	1	0	166	72	26.13	89	94	0.946809	4.17	3.64	1.86	1.19	1.8	8.2
361	0	62	1	0	1	84	1	0	163	75	28.22	100	104	0.961538	3.83	4.52	1.82	1.39	2.57	8.6
362	0	59	1	0	1	12	0	0	164	47	17.5	71	81	0.876543	4.23	2.96	1.82	0.99	1.28	10.7
363	0	45	0	0	1	2	1	1	172	66.5	22.48	87	92	0.945652	2.98	4.43	1.8	1.06	2.75	7.1
364	0	55	0	0	1	120	0	1	176	84	27.12	102	103	0.990291	3.38	4.25	1.8	1.22	2.09	5.6
365	0	75	1	0	1	120	1	0	162	78	29.72	85	90	0.944444	2.56	4.99	1.79	0.86	3.11	7.8
366	0	62	1	0	1	120	1	1	166	57	20.69	94	86	1.09302	3.17	3.82	1.79	0.91	2.25	6.7
367	0	67	1	0	1	132	1	1	169	70	24.51	99	101	0.980198	6.12	3.88	1.78	0.76	2.35	12.4
369	0	84	1	0	1	12	1	0	160	62	24.22	92	98	0.938776	4.32	2.88	1.78	0.76	1.47	5.9
370	0	86	1	0	1	6	1	0	165	48	17.6	80	82	0.97561	3.15	2.94	1.76	1	1.12	7.3
371	0	43	1	0	1	156	1	1	167	71	25.46	93	96	0.96875	3.23	4.31	1.72	0.85	2.7	6.9
372	0	65	1	0	1	36	1	1	160	55	21.48	72	82	0.878049	5.9	4.41	1.7	0.96	2.51	6.7
373	0	56	1	0	1	36	1	0	163	53.5	20.14	85	90	0.944444	3.53	2.55	1.7	0.84	1.17	10.7
374	0	68	1	0	1	240	1	1	163	57	21.45	86	90	0.955556	4.85	5.07	1.18	0.93	4	9.6
375	0	54	1	0	1	156	1	1	171	59	20.18	110	123	0.894309	4.8	4.64	1.16	0.82	3.7	9.6
376	0	82	0	0	1	12	1	1	156	60	24.65	85	90	0.944444	5.25	4.76	1.63	0.82	3.4	9.4
377	0	60	1	0	1	1	1	0	164	60	22.31	85	98	0.867347	2.23	4.76	1.53	0.8	3.4	11.3
378	0	66	1	0	1	6	1	0	170	65	22.5	89	100	0.89	4.07	4.93	1.44	0.77	3.32	8.6
379	0	55	1	0	1	240	1	1	178	90	28.41	92	102	0.901961	2.64	5	1.54	1.63	3.3	7.1
380	0	62	1	0	1	120	0	1	165	81	29.75	101	111	0.90991	3.51	5.01	0.74	1.3	3.21	13.3
381	0	84	1	0	1	240	1	1	160	61.5	24.02	94	101	0.930693	5.19	4.71	0.68	1.55	3.2	6.3
382	0	67	1	0	1	0.67	0	0	164	62.5	23.2	93	96	0.96875	3.4	4.96	1.65	1.2	3.12	8.9
383	0	54	1	0	1	120	0	0	166	63.5	22	90	92	0.978261	4.14	4.57	1.05	0.76	3.08	8.8
384	0	50	1	0	1	120	0	1	183	89	26.6	104	104	1	3.13	4.5	1.13	0.9	3.02	5.9
385	0	76	1	0	1	36	0	0	152	52	22.51	90	95	0.947368	3.09	4.5	1.18	1.23	3	9.1
386	0	69	1	0	1	264	1	0	179	91	28.4	112	117	0.957265	4.42	4.1	1.32	1.14	3	10.6
387	0	58	0	0	1	60	0	0	168	75	26.57	91	97	0.938144	1.96	4.39	1.12	1.06	2.99	6.7
388	0	72	1	0	1	156	1	0	167	73	26.18	94	98	0.959184	2.88	4.97	1.05	1.05	2.99	8.4
389	0	56	1	0	1	180	1	0	164	77	29	95	106	0.896226	5.85	4.45	1.42	1.02	2.98	8.8
390	0	66	1	0	1	156	0	1	172	75	25.35	94	98	0.959184	2.7	4.48	1.46	0.98	2.98	7.7
391	0	79	1	0	1	120	0	0	161	64	24.69	92	100	0.92	7.54	4.52	0.92	1.08	2.97	11
392	0	55	0	0	1	108	1	1	167	43	15.4	67	87.5	0.765714	5.79	4.32	1.39	1.02	2.96	11
393	0	57	1	0	1	120	1	0	170	56.5	19.55	73	91	0.802198	2.51	4.72	0.62	1.3	2.88	7.9
394	0	64	1	0	1	1	1	1	170	72	24.9	106	103	1.02913	3.31	4.45	1.38	1.25	2.87	9.9
395	0	68	1	0	1	396	1	1	169	83	29	110	108	1.01852	3.89	4.8	0.8	1.35	2.82	10.8
396	0	39	1	0	1	12	1	1	173	92	30.74	98	103	0.951456	3.38	4.41	1.26	0.96	2.82	7.6
397	0	71	1	0	1	60	1	1	178	75	23.67	107	107	1	3.27	3.9	1.09	1.24	2.8	11.6
398	0	46	0	0	1	3	1	1	175	81	26.45	95	99	0.959596	2.45	4	1.38	1.18	2.8	12
399	0	78	1	0	1	192	1	0	168	73	25.86	102	90	1.13333	4.38	4.59	0.82	1.21	2.79	8.2
401	0	72	1	0	1	180	1	0	170	70	24.22	99	101	0.980198	3.36	4.59	1.28	1.04	2.79	10.5
402	0	69	1	0	1	12	0	0	172	70	23.67	100	96	1.04167	2.65	4.89	0.77	1.42	2.75	8.4
403	0	70	1	0	1	240	1	1	173	77	25.7	98	98	1	3.56	4.28	0.54	1.53	2.73	11.7
404	0	56	0	0	1	120	0	0	158	59.5	23.8	88	88	1	3.59	4.46	1.23	0.95	2.73	7.8
405	0	57	1	0	1	240	0	0	165	59	21.6	75	79	0.949367	4.23	4.34	1.46	0.86	2.7	8.2
406	0	39	0	0	1	84	1	0	174	62	20.48	80	95	0.842105	3.6	4.27	1.55	0.83	2.7	9.4
407	0	64	1	0	1	144	1	1	172	78	26.4	104	98	1.06122	3.01	4.26	1.38	0.84	2.64	10.6
408	0	54	1	0	1	36	1	1	166	49.5	17.9	79	90	0.877778	3.02	4.71	1.17	1.42	2.63	5.5
409	0	60	1	0	1	12	0	0	160	72	28.13	95	100	0.95	4.47	4.37	0.9	1.12	2.63	9.4
410	0	50	1	0	1	120	1	1	160	68.5	26.76	94	103	0.912621	2.94	4.12	1	1.03	2.63	6
411	0	67	1	0	1	120	1	0	169	63	22.5	84	92	0.913043	3.87	4.23	1.41	0.96	2.62	16.7
412	0	70	0	0	1	120	1	0	167	67	24	85	87	0.977011	2.91	4.21	1.55	0.96	2.61	6
413	0	53	1	0	1	120	1	0	168	60	21.2	76	89	0.853933	3.82	3.9	0.96	1.1	2.6	12.1
414	0	52	0	0	1	48	1	1	170	67.5	23.4	90	97	0.927835	3.07	5.07	1.09	2.25	1.93	8.7
415	0	48	0	0	1	60	1	0	181	72.5	22.13	90	98	0.918367	3.04	4.75	0.51	2.2	1.61	9.6
416	0	65	1	0	1	324	0	1	164	69.8	25.9	95	97.5	0.974359	3.83	4.62	0.74	1.99	2.11	4.9
417	0	45	1	0	1	72	0	0	169	81.5	28.54	80	85	0.941176	2.48	4.16	0.43	1.95	1.8	8.6
418	0	74	1	0	1	84	0	1	164	59	21.9	84	94	0.893617	2.93	4.68	0.51	1.9	2.13	6.4
419	0	64	1	0	1	120	1	1	172	68	22.99	86	94	0.914894	5.22	4.58	1.28	1.64	2.4	9.1
420	0	46	1	0	1	96	0	0	178	70	22.1	80	92	0.869565	3.23	3.25	0.65	1.59	1.5	11.9
422	0	63	0	0	1	168	1	1	170	67	23.18	84	100	0.84	2.79	4.1	0.77	1.57	2.1	13.7
423	0	49	0	0	1	120	1	1	173	80	26.73	96	105	0.914286	2.67	4.44	0.96	1.57	2.04	9.1
424	0	53	1	0	1	48	0	0	175	88.5	28.9	96	107	0.897196	3.49	3.23	1.16	1.57	1.18	9
425	0	41	1	0	1	0.67	1	0	175	66	21.55	91	90	1.01111	3.8	3.15	0.72	1.45	1.31	7.3
426	0	63	0	0	1	120	1	1	163	63	23.71	79	91	0.868132	3.88	3.28	0.85	1.44	1.8	6.9
427	0	58	1	0	1	48	0	0	170	67	23	87.5	94	0.930851	3.02	4.62	0.62	1.37	2.55	8.1
428	0	50	0	0	1	156	0	0	168	87	30.82	104	100	1.04	3.42	4.13	0.76	1.34	2.05	8.8
429	0	45	0	0	1	120	0	0	175	87	28.41	100	98	1.02041	2.66	3.5	0.98	1.34	1.66	6.7
431	0	59	1	0	1	60	0	1	175	78	25	104	110	0.945455	3.51	3.63	1.52	1.31	1.5	11.5
432	0	60	1	0	1	72	0	0	155	54	22.48	86	84	1.02381	5.53	4.34	1.26	1.26	2.51	8.4
433	0	69	0	0	1	24	0	0	168	90	31.89	120	125	0.96	3.26	3.15	0.98	1.26	1.28	7
434	0	67	1	0	1	96	0	0	162	60	22.8	85	95	0.894737	6.32	3.08	0.57	1.24	1.41	8.5
435	0	85	1	0	1	120	1	1	165	60	22.04	98	101	0.970297	3.75	2.97	0.68	1.22	1.6	10
437	0	51	1	0	1	204	1	1	169	62	21.71	82	88	0.931818	6.12	3.31	0.73	1.19	1.56	7.2
438	0	63	0	0	1	72	1	1	166	74	26.9	91	94	0.968085	8.03	4.77	1.14	1.18	2.53	9.7
439	0	76	1	0	1	60	0	0	166	67	24.3	100.5	94	1.06915	3.45	4.03	0.66	1.18	2.33	9
440	0	49	1	0	1	156	1	1	174	72	23.78	85	97	0.876289	3.45	3	1.68	1.17	1.5	10
441	0	74	1	0	1	24	1	0	174	54	17.84	82	100	0.82	4.32	3.72	1.14	1.16	1.97	7.4
442	0	64	0	0	1	120	1	1	165	54	19.83	74	90	0.822222	3.22	3.11	1.14	1.14	1.46	8.4
443	0	53	1	0	1	24	1	0	169	78	27.3	88	98	0.897959	4.17	3.95	0.87	1.13	1.96	13.3
444	0	42	1	0	1	72	1	1	175	83	27.1	108	103	1.04854	4.01	2.95	0.56	1.11	1.38	10.1
445	0	48	0	0	1	144	0	0	172	61	20.62	85	92	0.923913	3.3	3.37	1.41	1.08	1.76	8.4
446	0	53	1	0	1	144	1	1	175	76	24.82	90	90	1	4.32	3.22	1.36	1.08	1.54	5.5
447	0	55	1	0	1	120	1	0	175	76.5	24	88	90	0.977778	6.31	3.95	1.18	1.07	2.22	9.3
448	0	70	1	0	1	4	1	1	165	72	26.45	90	95	0.947368	5.8	3.6	0.79	1.07	1.99	16.3
449	0	36	1	0	1	12	0	1	173	80.5	26.9	83	93	0.892473	6.14	3.67	0.97	1.06	2	7.6
450	0	67	0	0	1	120	0	0	161	71	27.39	107	101	1.05941	5.2	3.37	0.72	1.06	1.84	7.9
451	0	54	1	0	1	24	0	0	178	72	22.72	78	86	0.906977	3.92	4.71	1.68	1.05	2.53	8.7
454	0	61	1	0	1	120	1	0	170	69.5	24.05	90	93	0.967742	2.4	3.54	1.4	1.03	2.09	7.8
455	0	73	1	0	1	96	1	0	163	63	23.71	100	101	0.990099	4.21	3.84	1.56	1.01	2.5	8
456	0	82	1	0	1	24	1	0	167	78	27.97	104	107	0.971963	5.63	2.97	0.66	1.01	1.54	6.4
457	0	53	1	0	1	120	1	0	168	70	24.8	83	87	0.954023	4.34	3.61	1.33	0.98	2.07	8.2
458	0	83	1	0	1	48	0	1	163	60	22.58			#DIV/0!	2.8	3.93	1.43	0.92	2.55	10.7
459	0	51	1	0	1	276	1	0	164	57	21.1	77	91	0.846154	3.13	3.62	1.12	0.81	2.14	7.5
460	0	58	1	0	1	72	0	0	170	75	26	77	80	0.9625	7.64	2.65	1.26	0.59	1.42	6.3
461	0	43	1	0	1	1	1	0	185	99	28.93	107	104	1.02885	3.77	2.81	1.52	0.53	1.73	8.2
462	0	69	1	0	1	48	1	1	161	60	23.15	77	90	0.855556	6.69	1.48	1.08	2.89	0.62	5.7
463	0	39	1	0	1	12	1	1	175	86	28.08	80	80	1	3.83	4.25	0.87	2.43	1.66	9.4
464	1	57	0	0	0	240	0	0	156	62	25.5	90	90	1	2.98	3.58	0.94	1.28	1.8	12.9
465	1	77	1	0	0	120	0	0	148	62	30	100	100	1	3.84	4.11	1.69	1.26	1.84	12.4
466	1	56	1	0	0	240	0	0	157	53	21	87	96	0.90625	4.19	3.79	0.53	1.22	2.4	7.6
467	1	53	1	0	0	120	0	0	155	49	20.4	81	88	0.920455	4.73	3.74	0.57	1.22	1.68	9.8
468	1	60	0	0	0	144	0	0	152	50	21.64	81	87	0.931034	2.61	4.46	0.63	1.2	2.55	9.1
469	1	67	1	0	0	120	0	0	151	58	25	94	98	0.959184	4.31	3.9	1.08	1.15	2.22	6.7
470	1	55	1	0	0	84	0	0	152	70	30.3	94	104	0.903846	3.82	4.1	0.9	1.13	2.59	14.9
472	1	62	1	0	0	120	0	0	168	66	23.38	92	90	1.02222	5.2	3.69	1.31	1.08	1.99	10.6
473	1	61	0	0	0	60	0	0	159	54.5	21.56	82	90	0.911111	8.71	3.64	1.52	1.04	1.8	6.5
474	1	64	1	0	0	36	0	0	166	79	28.67	107	104	1.02885	3.77	4.07	1.48	0.99	2.27	6.8
475	1	59	1	0	0	204	0	0	163	47	17.7	77	87	0.885057	5.76	3.86	1.51	0.99	1.95	14.2
476	1	78	0	0	0	48	0	0	147	50	23.14	90	98	0.918367	5.1	3.71	1.07	0.98	1.79	11.1
477	1	60	1	0	0	1	0	0	150	54	24	88	91	0.967033	3.82	4.42	1.26	0.96	2.44	6.9
478	1	51	0	0	0	24	0	0	158	58.5	23.43	78	89	0.876404	2.16	3.75	1.29	0.94	2.34	6.6
479	1	58	1	0	0	120	0	0	164	74	27.51	94	92	1.02174	3.78	4.2	1.25	0.93	2.48	6.9
480	1	54	1	0	0	132	0	0	155	65	27.06	92	100	0.92	7.56	3.95	1.44	0.92	2.09	15.8
481	1	59	1	0	0	192	0	0	158	54.5	21.83	73	90	0.811111	4.77	2.64	0.68	0.75	1.47	10.1
482	1	54	1	0	0	180	0	0	156	51	20.96	77	87	0.885057	3.79	3.26	1.1	0.7	2.06	7.5
483	1	55	1	0	0	144	0	0	155	53.5	22.27	82	90	0.911111	5.53	2.7	0.98	0.64	1.6	13.8
485	1	71	1	0	0	120	0	0	160	68	26.56	96	96	1	4.72	3.44	1.61	0.48	2.25	12.1
486	1	69	1	0	0	72	0	0	162	63	24	90	98	0.918367	7.21	3.34	1.47	0.4	2.13	11.1
487	1	54	1	0	1	216	0	0	160	69	26.95			#DIV/0!	2.03	3.42	1.06	1.25	1.73	7.6
488	1	60	1	0	1	180	0	0	155	55	22.89	95	89	1.06742	3.87	4.43	1.55	1.23	2.41	8
489	1	68	1	0	1	96	0	0	157	57	23	87	100	0.87	2.89	4.05	1.32	1.23	2.07	5.9
490	1	73	1	0	1	60	0	0	150	63	28	96	104	0.923077	4.14	2.97	0.75	1.21	1.75	9.3
491	1	71	1	0	1	156	0	0	152	85	36.79	120	120	1	4.39	3.93	1.35	1.17	2.17	9.1
492	1	83	1	0	1	240	0	0	152	47	20.34	80	90	0.888889	2.93	3.77	1.11	1.15	1.87	8.7
493	1	58	1	0	1	0.5	0	0	149	63	28.38	103	118	0.872881	4.55	3.08	0.63	1.15	1.7	8.5
494	1	55	1	0	1	60	0	0	162	45	17.15	83	95	0.873684	5	3.82	0.63	1.1	2.27	8.5
496	1	51	1	0	1	108	0	0	160	48	18.75	80	78	1.02564	2.36	3.6	0.76	1.06	2.2	6.3
497	1	74	1	0	1	2	0	0	162	56	21.3	94	94	1	6.14	3.99	0.74	1.03	2.5	9.6
498	1	60	1	0	1	24	0	0	163	58	21.8	86	98	0.877551	3.91	3.91	1.6	1.02	1.97	14.7
499	1	62	1	0	1	240	0	0	165	64	23.5	94	103	0.912621	10.59	3.85	0.64	0.99	2.18	9
500	1	81	1	0	1	240	0	0	160	75	29.3	110	106	1.03774	2.95	3.71	0.92	0.98	2.24	7.4
501	1	58	1	0	1	216	0	0	135	78	42.8	121	115	1.05217	3.37	3.59	1.2	0.98	2	6.8
502	1	76	1	0	1	138	0	0	150	52	23.11	88	87.5	1.00571	5.66	3.6	1.22	0.97	2.3	9.2
503	1	51	1	0	1	84	0	0	160	53.5	20.9	76	84	0.904762	3.44	3.69	1.18	0.91	2.31	9.7
504	1	72	1	0	1	240	0	0	158	55.5	22.23	90	95	0.947368	6.44	3.19	0.93	0.91	1.79	11.2
505	1	76	1	0	1	120	0	0	147	40.5	18.7	70	85	0.823529	3.13	3.34	1.56	0.9	1.63	9.2
506	1	74	1	0	1	1	0	0	147	48	22.21	91	87	1.04598	3.27	2.71	1.62	0.89	1.28	9.1
507	1	56	1	0	1	120	0	0	150	51	22.66	85	92	0.923913	6.41	3.44	1.02	0.83	1.79	6.2
508	1	61	0	0	1	180	0	0	152	48	20.8	78	84	0.928571	3.57	3.25	1.12	0.79	2.05	14.9
509	1	59	1	0	1	144	0	0	154	50	21.08	85	93	0.913978	3.56	3.38	1.15	0.79	1.97	6.9
510	1	70	1	0	1	120	0	0	152	68	29.43	91	101	0.90099	4.41	2.63	0.71	0.78	1.38	7.8
511	1	63	1	0	1	12	0	0	155	52	21.6	73	87	0.83908	5.89	2.46	1.07	0.77	1.24	11.8
512	1	56	1	0	1	108	0	0	152	52	22.51	82	89	0.921348	4.98	3.32	1.58	0.75	2.04	5.6
513	1	69	1	0	1	108	0	0	145	52	24.73	86	92	0.934783	6.99	2.57	1.05	0.71	1.38	11.3
514	1	66	1	0	1	144	0	0	159	68.5	27.1	95	100	0.95	5.1	3.26	1.54	0.7	1.85	14.6
515	1	60	1	0	1	156	0	0	158	57	22.83	95	95	1	4.64	3.37	1.3	0.7	1.85	9
516	1	63	1	0	1	144	0	0	158	67	26.9	89	100	0.89	5.03	2.2	1.25	0.59	1.04	6.4
517	1	67	1	0	1	240	0	0	156	60	24.65	96	90	1.06667	6.59	2.2	0.96	0.53	1.33	7.3
518	1	59	1	0	0	116	0	0	163	87	32.7	106	103	1.02913	3.12	10.56	18	1.02	1.79	11.4
519	1	73	1	0	0	60	0	0	147	50	23.14	85	88	0.965909	2.75	8.15	14.51	0.62	2.07	12.1
520	1	68	1	0	0	60	0	0	147	42	19.44	68	84	0.809524	3.76	7.57	1.09	1.66	5.18	8.8
521	1	65	1	0	0	180	0	0	160	49	19.1	87	88	0.988636	4.68	7.09	0.85	1.36	5.38	13.3
522	1	64	0	0	0	192	0	0	151	61	26.75	93	99	0.939394	2.99	6.87	1.42	1.13	4.88	11.6
523	1	46	1	0	0	0.5	0	0	157	65	16.8	80	90	0.888889	3.37	6.81	2.07	1.4	4.25	9.2
524	1	83	0	0	0	120	0	0	153	67	28.6	80	83	0.963855	4.31	6.79	2.06	1.29	4.2	13
525	1	65	0	0	0	36	0	1	152	58	25.1	68	70	0.971429	2.13	6.73	4.64	1.42	3.78	7.3
526	1	40	0	0	0	36	0	0	155	59	24.56	88	97	0.907216	5.05	6.55	1.67	1.59	4.03	11.6
527	1	82	1	0	0	60	0	0	150	66.5	29.6	92.5	95	0.973684	4.45	6.33	1.55	1.27	4.01	13.5
528	1	76	0	0	0	156	0	0	154	50	21.08	83	97	0.85567	2.5	6.27	1.03	1.53	3.9	8.8
529	1	68	1	0	0	120	0	0	160	54.5	21.28	86	90	0.955556	2.7	6.2	6.39	0.93	2.55	11.6
530	1	55	1	0	0	96	0	0	156	69	28.35	88	99	0.888889	2.53	6.2	3.98	0.96	3.95	8.4
531	1	70	1	0	0	240	0	0	144	44	21.22	76.5	91	0.840659	3.27	6.2	1.22	1.28	3.99	10
532	1	78	0	0	0	180	0	0	159	64	25.32	90	96	0.9375	3.71	6.1	1.87	0.95	4.29	9.2
533	1	55	1	0	0	24	0	0	154	65	27.4	87	89	0.977528	2.88	6.08	1.86	0.93	4.05	13.9
534	1	52	1	0	0	24	0	0	149	52	23.42	79	76	1.03947	2.49	5.91	1.6	1.12	3.73	15.9
535	1	61	1	0	0	96	0	0	157	52	21	81	90	0.9	5.82	5.91	1.33	0.94	4.4	12.6
536	1	58	1	0	0	192	0	0	155	59	24.56	84	88	0.954545	4.28	5.83	1.68	1.68	2.9	7.7
537	1	50	1	0	0	120	0	0	160	60	23.44	86	91	0.945055	3.83	5.81	1.27	1.27	4.18	9.6
539	1	27	0	0	0	1	0	0	156	49	20.13	76	90	0.844444	2.47	5.78	1.75	1.08	3.68	9.9
541	1	78	1	0	0	204	0	0	154	59	24.8	95	100	0.95	3.41	5.67	0.95	0.87	4.15	13.6
542	1	66	0	0	0	228	0	0	153	70	29.9	100	97	1.03093	1.16	5.65	1.26	1.32	3.57	13.2
543	1	37	0	0	0	24	0	0	157	60	24.34	85	88	0.965909	3.21	5.64	1.23	1.13	3.79	10.7
544	1	64	1	0	0	120	0	0	140	45	22.96	79.5	89	0.893258	3.65	5.47	2.53	1.08	3.39	8.8
546	1	62	1	0	0	2	0	0	152	38	16.45	67	98	0.683673	5.66	5.4	1.02	2.06	2.64	9.1
547	1	78	1	0	0	240	0	0	146	41	19.23	84	82	1.02439	4.49	5.4	0.62	2.25	2.43	13.4
548	1	72	0	0	0	240	1	1	153	58	24.78	80	81	0.987654	2.68	5.38	3.86	1.03	2.91	9.5
549	1	64	1	0	0	36	0	0	160	64.5	25.2	93	100	0.93	3.19	5.38	0.93	0.85	3.02	12.1
550	1	62	1	0	0	36	0	0	159	60	23.73	89	104	0.855769	3.8	5.38	0.78	1.57	3.37	8
551	1	56	1	0	0	204	0	0	163	67.5	25.41	101	95	1.06316	3.63	5.29	1.67	0.92	3.17	6.2
552	1	73	1	0	0	120	0	0	140	44.5	22.7	87	84	1.03571	2.92	5.28	0.87	1.35	3.2	9
554	1	53	1	0	0	120	0	0	162	71	27	96	103	0.932039	2.67	5.16	1.88	0.72	3.24	9.6
555	1	42	0	0	0	24	0	0	158	52.5	21.03	72	86	0.837209	3.06	5.16	0.88	1.43	2.82	6.7
556	1	65	1	0	0	36	0	0	160	80	31.25	90	94	0.957447	3.21	5.15	1.37	1.2	2.77	8.6
557	1	55	1	0	0	204	0	0	164	60	22.31	90	100	0.9	3.11	5.08	2.42	1.22	2.92	7.6
558	1	81	0	0	0	560	0	0	160	55	21.48	92	94	0.978723	2.51	4.56	3.67	0.86	2.13	10.1
559	1	60	0	0	0	120	0	0	158	68.5	27	101	97	1.04124	3.34	4.25	3.45	0.82	1.73	8.7
560	1	75	0	0	0	3	0	0	163	58	21.83	84	94	0.893617	3.64	4.94	2.99	1.04	2.82	10.2
562	1	50	1	0	0	36	0	0	160	55	21.5	80	93	0.860215	3.33	4.06	2.71	0.83	1.93	6.1
563	1	58	1	0	0	120	0	0	150	63.5	28.2	98	96	1.02083	3.4	4.29	2.64	1.04	2.51	7.4
564	1	71	1	0	0	144	0	0	156	55	22.6	81	91	0.89011	5.8	4.25	2.61	0.45	2.51	12.9
565	1	80	1	0	0	12	0	0	160	55	21.48	85	100	0.85	3.17	4.21	2.28	0.93	2.22	14.2
566	1	53	1	0	0	120	0	0	156	50	20.5	84	91	0.923077	2.59	4.43	2.24	0.71	2.51	10.6
567	1	67	0	0	0	36	0	0	148	70.5	32.19	105	108	0.972222	2.71	4.42	2.24	1.04	2.13	9.1
568	1	54	0	0	0	6	0	0	155	59.5	24.77	94	97	0.969072	3.07	4	2.15	0.98	2.6	12
569	1	55	1	0	0	96	0	0	156	60	24.65	129	130	0.992308	2.96	4.44	2.09	1.12	2.59	7.7
570	1	66	1	0	0	2	0	0	155	52	21.64	85	90	0.944444	2.9	3.93	1.96	1.09	1.94	6.8
572	1	75	0	0	0	120	0	0	150	64	28.4	97	99	0.979798	3.72	4.6	1.91	1.21	2.7	12.3
574	1	43	1	0	0	24	0	1	160	66	25.78	78	88	0.886364	3.77	4.83	1.23	0.71	3.67	11.1
575	1	70	1	0	0	144	0	0	156	62	25.48	96	96	1	2.8	5	0.85	1.28	3.3	11.1
576	1	65	1	0	0	240	0	0	154	58	24.5	94	87	1.08046	3.31	4.93	1.58	1.09	3.25	14.7
577	1	57	1	0	0	36	0	1	152	57.5	24.9	75	86	0.872093	2.75	5.04	1.13	1.04	3.23	9
578	1	63	1	0	0	120	0	0	151	63	27.63	95	100	0.95	4.82	4.68	1.06	0.98	3.05	9.4
580	1	67	0	0	0	192	0	0	150	59.5	26.44	96	96	1	3.38	5.08	0.94	1.22	2.95	8.4
581	1	59	1	0	0	36	0	0	155	40	16.65	70	76	0.921053	4.66	4.63	1.65	0.86	2.79	9.7
582	1	71	0	0	0	360	0	0	155	58	24.1	87	90	0.966667	2.55	4.57	1.41	0.85	2.74	8.1
583	1	64	0	0	0	72	0	0	150	40	17.78	75	80	0.9375	2.05	4.5	0.64	1.91	2.7	13.7
584	1	58	1	0	0	18	0	0	160	51	19.9	86	89	0.966292	3.66	4.45	1.03	1.02	2.68	12.3
586	1	79	1	0	0	24	0	0	146	50	23.5	85	95	0.894737	3.54	4.56	1.2	1.23	2.64	9.3
587	1	52	1	0	0	204	0	0	165	66	24.2	87	91	0.956044	3.29	5	1.37	1.49	2.63	9.6
588	1	79	1	0	0	120	0	0	152	50	21.6	87	91	0.956044	3.09	4.54	1.44	1.39	2.62	7.9
589	1	70	0	0	0	120	0	0	163	90	33.9	109	108	1.00926	5.83	4.26	1.38	1.04	2.62	7.4
590	1	48	0	0	0	72	0	0	167	93.5	33.53	101	108	0.935185	2.75	4.18	0.61	1.67	2.19	9.7
591	1	52	1	0	0	144	0	0	164	62	23.05	88	98	0.897959	2.59	4.5	0.58	1.67	2.18	8.3
592	1	90	1	0	0	8	0	0	156	62	25.48	94	104	0.903846	3.06	3.73	1.27	1.63	1.47	10.9
593	1	52	0	0	0	96	0	0	165	68	24.98	96	102	0.941176	2.91	4.83	0.99	1.5	2.44	10.8
594	1	59	1	0	0	24	0	0	160	53	20.7	89	105	0.847619	2.55	3.06	0.36	1.45	1.67	11.5
595	1	61	1	0	0	132	0	0	150	42	18.67	69	91	0.758242	2.96	3.4	0.58	1.3	2.2	13.8
596	1	69	0	0	0	300	0	0	157	56	22.72	92	95	0.968421	2.95	4.21	0.69	1.1	2.57	9.9
597	1	58	0	0	0	0.1	0	0	163	54	20.32	84	87	0.965517	3.05	5.53	1.64	1.28	3.53	10.4
598	1	68	1	0	1	120	0	0	155	61.5	25.63	102	102	1	4.49	3.43	1.29	1.15	1.55	6.6
599	1	84	1	0	1	12	0	0	160	45	17.58	87.5	95	0.921053	4.1	9.63	5.84	1.58	4.98	9.7
600	1	63	1	0	1	204	0	0	150	60	26.67	90	107	0.841121	5.36	9.2	1.91	0.95	7.4	10.8
601	1	58	1	0	1	1	0	0	163	93	35	123	123	1	3.51	8.71	6.22	1.11	4.44	10
603	1	52	1	0	1	240	1	1	160	47	18.36	75	92	0.815217	3.72	8.03	3.4	1.03	5.31	10.7
604	1	82	0	0	1	2	0	0	149	61	27.48	96.5	103.5	0.932367	2.95	7.75	10.99	0.84	2.3	13.4
605	1	75	1	0	1	120	0	0	155	59	24.56	85	90	0.944444	3.91	7.4	3.2	0.98	5.2	9.3
606	1	50	1	0	1	96	0	0	167	93	33.3	107	114	0.938596	3.87	7.26	2.13	1.12	4.35	9.7
608	1	59	1	0	1	80	0	0	160	71	27.73	110	101	1.08911	3.71	6.79	1.21	1.72	4.24	11.8
609	1	67	1	0	1	84	0	0	147	43	19.9	68	81	0.839506	3.67	6.66	1.66	1.26	4.16	15.4
610	1	54	1	0	1	120	0	0	156	64	26.3	93	95	0.978947	5.87	6.66	1.45	1.35	4.35	9.1
611	1	63	1	0	1	120	0	0	157	67	27.18	82	85	0.964706	3.77	6.62	1.51	1.17	4.27	8.5
612	1	48	1	0	1	84	0	0	164	105	39.04	114	128	0.890625	3.34	6.6	1.33	1.4	4.4	6.7
613	1	71	1	0	1	240	0	0	150	62	27.6	95	100	0.95	3.39	6.52	1.04	1.4	5.5	13.1
614	1	55	1	0	1	24	0	0	159	55	21.7	76	89	0.853933	2.9	6.38	1.8	1.82	4.08	9.6
615	1	57	1	0	1	120	0	0	160	54	21.09	90	95	0.947368	4.57	6.32	1.3	1.1	3.86	7.9
616	1	57	1	0	1	120	1	0	149	38.5	17.34	71	84	0.845238	3.96	6.3	2.25	0.97	4.6	12.2
617	1	67	1	0	1	240	0	0	154	52	21.93	79	87	0.908046	3.88	6.28	2.14	1.03	3.53	7
618	1	60	1	0	1	60	0	0	155	58	24.14	86	95	0.905263	6.55	6.17	0.83	1.27	4.23	8.5
619	1	53	1	0	1	48	0	0	162	78	29.7	100	97	1.03093	4.51	6.05	3.89	1.17	3.45	9.9
620	1	72	1	0	1	360	0	0	153	52	22.21	87	99	0.878788	3.67	6.05	3.68	0.92	3.22	11.4
621	1	55	1	0	1	48	0	0	159	57	22.55	95	100	0.95	7.31	6.04	0.96	1.2	3.93	13.5
622	1	56	1	0	1	216	0	0	164	79.5	29.56	100	103	0.970874	2.82	6	2.69	1.2	3.81	8.2
623	1	71	1	0	1	120	0	0	155	61	25.4	99	102	0.970588	3.28	5.97	2.26	0.84	3.63	6.4
624	1	64	1	0	1	156	0	0	158	65	28.89	86	96	0.895833	3.8	5.78	1.1	1.23	4.06	7.1
625	1	71	1	0	1	120	0	0	149	57	25.67	85	90	0.944444	4.07	5.77	2.45	1.32	3.38	8.1
626	1	58	1	0	1	48	0	0	154	52	21.9	82	91	0.901099	4.04	5.75	3.38	1.07	3.08	6.9
627	1	75	1	0	1	144	0	0	159	62	24.52	98	110	0.890909	3.8	5.68	2.6	0.91	3.45	9.7
629	1	35	1	0	1	84	1	1	155	59.5	24.77	86	86	1	3.21	5.57	2.03	1.13	3.11	12.9
631	1	47	0	0	1	144	0	0	156	50.5	20.75	78	88	0.886364	3.31	5.56	3.89	1.39	2.55	7
632	1	87	1	0	1	144	0	0	157	49	19.88	85	87	0.977011	3.15	5.54	1.37	1.2	3.88	7.8
633	1	60	1	0	1	24	0	0	150	43	19.11	78	95	0.821053	2.46	5.52	2.21	0.8	3.45	5.9
634	1	64	0	0	1	156	0	0	158	59	23.63	90	90	1	2.52	5.5	1.62	1.5	3.31	8.8
635	1	50	1	0	1	84	0	0	164	76	28.2	90	83	1.08434	3.47	5.48	1.02	1.25	3.3	11
636	1	79	1	0	1	240	0	0	151	70	30.7	101	99	1.0202	4.04	5.47	2.21	0.9	3.47	9.4
637	1	51	0	0	1	192	0	0	161	70	27.01	99	101	0.980198	3.65	5.46	2.53	1	3.23	15.1
638	1	63	1	0	1	60	0	0	158	70	28	110	105	1.04762	4.13	5.45	1.57	1.22	3.22	7.6
639	1	67	0	0	1	96	0	0	155	68	28.3	114	108	1.05556	2.25	5.44	1.39	1.44	3.11	7.8
640	1	61	1	0	1	180	0	0	156	61.5	25.27	86	92	0.934783	5.45	5.4	2.15	0.99	3.59	9.8
641	1	53	0	0	1	60	0	0	167	70	25.1	97.5	102.5	0.95122	4.12	5.3	1.81	1.26	3.36	14.2
642	1	61	1	0	1	36	0	0	157	55	22.3	86	89	0.966292	3.81	5.24	2.53	0.75	2.71	7.6
643	1	63	1	0	1	168	0	0	152	61	26.4	90	97	0.927835	2.74	5.22	3.18	0.68	2.99	11.9
644	1	65	1	0	1	60	0	0	159	59	23.34	94	95	0.989474	3.1	5.19	0.86	1.89	2.1	11.2
645	1	81	1	0	1	12	0	0	151	51	22.37	84	92	0.913043	4.81	5.18	1.74	0.94	3.73	7.1
646	1	55	1	0	1	120	1	0	153	48	18.1	87	86	1.01163	3.49	5.17	1.79	1.04	3.1	7.6
647	1	59	1	0	1	12	0	0	156	55	22.6	84	91	0.923077	5.83	5.12	2.07	1.15	2.79	8.1
648	1	51	0	0	1	24	0	0	152	54	23.4	85	90	0.944444	3.8	5.1	2.2	1.27	2.66	9.5
649	1	63	0	0	1	120	0	0	152	61.5	26.62	109	102	1.06863	3.8	4.68	4.28	1.09	2.17	7.6
650	1	60	1	0	1	156	0	0	163	67	25.22	83	94	0.882979	2.59	2.94	4.14	0.58	1	6.7
651	1	65	1	0	1	120	1	1	149	41	18.47	55	60	0.916667	4.07	4.7	3.97	0.97	2.3	8.4
652	1	77	1	0	1	6	1	1	149	61	27.48	105	98	1.07143	2.91	4.32	3.91	0.77	2.19	7.4
653	1	65	1	0	1	120	0	0	168	69	24.4	98	100	0.98	3.8	4.39	3.69	0.81	2.22	8.7
654	1	61	1	0	1	156	0	0	160	60	23.4	94	90	1.04444	3.71	4.22	3.59	1.17	2.09	11.5
655	1	52	1	0	1	60	0	0	151	59	25.8	87	91	0.956044	3.45	5.01	3.57	1.42	2.34	9
657	1	39	1	0	1	36	0	0	160	50	19.53	88	90	0.977778	3.54	4.38	3.08	0.99	2.3	8.4
658	1	75	1	0	1	228	0	0	154	55	23	83	87	0.954023	2.79	3.81	3.08	0.67	1.75	5.6
659	1	57	1	0	1	72	0	0	154	74	31.2	90	98	0.918367	4.83	4.94	2.88	0.88	2.72	11.9
660	1	68	1	0	1	48	0	0	144	49	23.63	87	89	0.977528	4.62	2.91	2.71	0.53	1.21	8.2
662	1	60	1	0	1	216	0	0	157	54	21.9	85	95	0.894737	4.98	3.73	2.5	0.98	1.68	10.5
663	1	70	1	0	1	120	0	0	154	49	20.6	96	92	1.04348	3.87	3.83	2.43	0.91	1.8	8.9
664	1	57	1	0	1	0.67	0	0	170	54	18.68	80	90	0.888889	3.54	4.99	2.36	0.73	3.09	12.3
665	1	65	1	0	1	72	0	0	167	70	25.1	80	90	0.888889	2.92	4.34	2.36	0.9	2.39	7
666	1	68	1	0	1	120	0	0	152	45.5	19.48	74	84	0.880952	2.87	2.18	2.33	0.61	0.97	8.3
667	1	77	1	0	1	120	0	0	148	59	26.94	151	107	1.41121	3.33	4.94	2.26	1.01	2.37	6.7
668	1	43	1	0	1	120	0	0	157	55	22.31	83	96	0.864583	2.55	5	2.25	0.9	3.1	8.2
669	1	50	1	0	1	156	0	0	163	55	20.7	79	89	0.88764	5.18	3.62	2.23	0.53	1.93	11
671	1	61	1	0	1	120	0	0	156	46	18.9	69	84	0.821429	3.13	3.68	2.21	0.85	1.87	8.8
672	1	59	1	0	1	96	0	0	152	73	31.6	95	105	0.904762	5.27	4.74	2.17	1.18	2.43	7.9
673	1	65	1	0	1	96	0	0	158	59	23.63	82	85	0.964706	3.55	4.38	2.16	1.26	2.26	6.5
674	1	83	1	0	1	36	0	0	149	61.5	27.7	103	109	0.944954	2.23	3.46	2.07	0.74	1.9	13.2
675	1	70	0	0	1	120	0	0	152	53.5	23.46	89	100	0.89	3.04	4.7	2.04	0.95	2.64	8.6
676	1	76	1	0	1	108	0	0	155	65	27	86	90	0.955556	4.91	4.28	1.99	0.77	2.74	13.7
677	1	86	1	0	1	120	0	0	150	72	32	105	112	0.9375	5.7	3.7	1.98	1.12	2.1	7.7
679	1	59	1	0	1	204	0	0	163	65	24.46	90	100	0.9	4.14	4	1.94	1.04	2.19	9.6
680	1	64	1	0	1	48	0	0	148	70	31.9	114	107	1.06542	4.12	4.78	1.91	0.95	3.01	10.1
681	1	68	1	0	1	180	0	0	155	54	22.48	70	80	0.875	2.11	3.89	1.82	1.23	2.32	9.5
683	1	85	1	0	1	360	0	0	147	50.5	23.37	82	85	0.964706	3.88	4.27	1.79	0.76	2.58	7.5
684	1	62	1	0	1	120	0	0	151	48	21	75	92	0.815217	8.92	4.15	1.78	1.24	2.19	11
685	1	65	1	0	1	120	0	0	162	79	30.1	96	104	0.923077	3.19	4.75	1.77	0.77	2.96	6.9
686	1	81	1	0	1	480	0	0	154	49.5	20.9	98	96	1.02083	3.96	4.03	1.75	0.92	2.35	6.6
687	1	65	1	0	1	144	0	0	157	60.5	24.54	90	96	0.9375	2.61	2.98	1.75	0.93	1.48	7.9
688	1	63	1	0	1	60	0	0	162	82	31.25	107	115	0.930435	2.94	3.1	1.73	0.72	1.62	7.7
689	1	66	1	0	1	204	0	0	167	61	21.8	93	105	0.885714	10.71	2.47	1.72	0.29	1.25	12.4
690	1	50	1	0	1	60	0	0	153	55.5	23.7	80	81	0.987654	3.56	5.04	1.12	0.97	3.33	9.1
691	1	78	1	0	1	12	0	0	155	63	26.22	94	90	1.04444	2.91	4.83	0.91	1.53	3.2	11.1
692	1	61	1	0	1	240	0	0	173	83	27.73	95	101	0.940594	2.79	4.67	1.06	0.91	3.2	7.9
693	1	73	1	0	1	120	0	0	154	55.5	23.4	97	106	0.915094	6.07	4.1	1.18	0.69	3.2	11.7
694	1	55	1	0	1	48	0	0	158	71	28.44	104	106	0.981132	3.66	4.83	1.38	0.77	3.17	8.5
695	1	65	1	0	1	120	0	0	156	79	32.5	115	110	1.04545	3.25	5.01	0.93	1.25	3.12	6
696	1	51	1	0	1	96	0	0	160	75	29.3	102	98	1.04082	3.06	5	1.38	1.71	3	9.1
697	1	74	0	0	1	240	0	0	153	75	32	114	104	1.09615	4.23	4.35	1.24	0.86	2.91	6.2
698	1	68	1	0	1	120	0	0	147	59	27.3	90	95	0.947368	4.07	4.6	1.52	0.79	2.91	11.9
699	1	46	1	0	1	1	0	0	165	72	26.45	95	98	0.969388	2.19	4.1	0.98	1.05	2.9	8.9
700	1	40	1	0	1	57	0	0	160	76	29.7	100	104	0.961538	3.32	3.99	1.09	0.95	2.9	11.5
701	1	54	0	0	1	264	0	0	158	69	27.6	100	100	1	2.28	4.45	1.58	0.83	2.85	9.2
702	1	56	1	0	1	96	0	0	157	58	23.53	90	101	0.891089	4.31	4.28	0.82	0.76	2.72	10.1
703	1	66	1	0	1	36	0	0	149	43	19.37	72.5	81.5	0.889571	2.8	4.89	1.21	1.35	2.68	8.1
704	1	49	1	0	1	36	0	0	152	59	25.54	94	94	1	3.98	4.51	1.03	1.07	2.65	6.6
705	1	62	1	0	1	120	0	0	152	55	23.81	78	95	0.821053	5.33	4.72	1.46	1.39	2.64	7.7
706	1	70	0	0	1	240	0	0	154	54	22.8	94	85	1.10588	3.89	3.94	0.94	2.03	1.4	6.9
707	1	74	1	0	1	180	0	0	158	63.5	25.44	90	85	1.05882	2.5	4.78	0.72	1.94	2.15	9.7
708	1	62	1	0	1	120	0	0	163	55	20.7	79	89	0.88764	2.82	4.23	1.03	1.75	1.82	7.2
709	1	63	0	0	1	120	0	0	157	86	34.89	110	110	1	3.94	4.87	1.6	1.68	2.43	9.8
710	1	76	1	0	1	120	0	0	140	50	25.5	90	93	0.967742	2.88	4.91	1.46	1.59	2.49	6.7
711	1	61	1	0	1	120	0	0	156	50	20.55	77	74	1.04054	3.04	4.45	0.88	1.42	2.44	5.5
712	1	84	1	0	1	84	0	0	152	57	24.6	100	103	0.970874	5.53	4.68	1.03	1.42	2.38	11.9
713	1	57	1	0	1	84	0	0	153	59	25.2	83	94	0.882979	2.76	3.27	0.68	1.37	1.68	6.5
714	1	63	1	0	1	96	0	0	151	50	21.93	89	89	1	3.29	3.91	1.11	1.34	2.07	6.5
715	1	69	1	0	1	216	0	0	156	60	24.6	94	98	0.959184	3.73	3.97	1.53	1.33	2.56	9.7
716	1	69	1	0	1	84	0	0	158	50	20.03	82	93	0.88172	2.81	3.52	0.6	1.32	2.2	7.4
717	1	65	1	0	1	84	0	0	155	60	24.97	96	101	0.950495	3.41	2.69	1.16	0.98	1.46	6.6
718	1	75	1	0	1	240	0	0	153	66.5	28.41	104	106	0.981132	5	2.43	0.99	0.94	1.05	7.1
719	1	58	0	0	1	36	0	0	158	60	24	85	94	0.904255	3.34	2.85	1.18	0.91	1.46	8.5
720	1	56	1	0	1	5	0	0	150	42	18.7	85	88	0.965909	3.55	4.3	1.67	0.77	2.41	10
721	1	44	1	0	1	0.5	0	0	160	64.5	25.2	84	99	0.848485	9.62	2.86	1.44	0.58	1.56	8.2
722	0	78	1	1	0	12	0	0	152	51	22.07	88	88	1	6.03	3.66	0.58	0.96	2.09	7.3
723	0	69	1	1	0	156	0	0	157	56	22.72	77	81	0.950617	2.71	3.8	0.82	0.93	2.16	8.1
724	0	51	1	1	0	1.33	0	0	163	65	24.46	92	102	0.901961	3.32	3.48	0.64	0.92	2.32	7.7
725	0	50	1	1	0	96	1	1	163	60	22.58	88	94	0.93617	4.06	3.83	1.45	0.89	2.32	9.8
726	0	79	1	1	0	60	1	0	158	57.5	23.03	97	102	0.95098	4.61	3.83	1.37	0.84	2.59	8.5
728	0	18	1	1	0	0.5	0	0	178	110	34.72	110	108	1.01852	3.36	3.85	0.91	0.75	2.46	11.4
729	0	61	1	1	0	120	1	1	170	72.5	25.09	94	90	1.04444	4.24	3.58	1.32	0.75	2.27	9.6
730	0	52	1	1	0	10	1	1	175	66	21.55	83	92	0.902174	3.15	3.95	1.62	0.7	2.51	5.8
731	0	80	0	1	0	24	1	0	170	69	23.88	108	118	0.915254	4.02	3.7	1.42	0.64	2.47	8.6
732	0	55	1	1	1	192	1	1	166	75	27.22	98	98	1	4.68	2.09	0.71	0.88	0.87	10.7
734	0	56	1	1	1	120	1	0	162	68	25.91	98	105.5	0.92891	4.42	2.82	1.39	0.96	1.04	7.4
735	0	63	1	1	1	36	1	0	166	77	27.9	86	100	0.86	3.9	4.23	1.49	0.91	2.36	6.8
736	0	78	1	1	1	240	1	0	171	67	22.91	102	97	1.05155	2.59	3.54	1.21	0.85	1.98	5.2
737	0	70	0	1	1	84	0	0	170	50	17.3	69	77	0.896104	3.85	2.94	1.19	0.83	1.9	13.2
738	0	70	1	1	1	24	1	0	167	52	18.6	78	80	0.975	6.18	3.4	1.34	0.8	1.53	7.3
739	0	58	1	1	1	240	0	0	165	63	23.1	83	91	0.912088	4.24	3.9	1.2	0.78	2.5	6.5
740	0	53	1	1	1	180	0	1	180	72	22.2	84	90	0.933333	6.91	3.91	1.68	0.78	2.3	9.8
741	0	62	1	1	1	108	1	1	165	69	25.34	85	93	0.913978	4.12	2.32	1.37	0.74	1.24	7.1
743	0	67	1	1	0	72	1	0	170	76	26.3	100	110	0.909091	3.74	9.55	2.26	1.41	6.82	13.3
744	0	70	1	1	0	120	0	0	163	71	26.72	102	100	1.02	3.36	8.17	2.94	1.02	5.08	14
747	0	78	1	1	0	216	1	0	178	73	23.04	87	92	0.945652	4.33	6.8	0.83	1.64	5.2	15.2
749	0	66	1	1	0	96	0	0	163	83	31.24	107	110	0.972727	3.3	6.43	3.21	0.89	4.18	7.8
750	0	44	0	1	0	48	1	0	176	85.5	27.6	100.4	99	1.01414	3.75	6.26	1.47	1.26	3.52	12.5
751	0	57	1	1	0	6	0	0	166	61	22.14	83	91	0.912088	4.28	6.25	0.49	1.49	4.16	18
752	0	49	1	1	0	120	1	0	166	62	22.5	91	96	0.947917	3.69	6.17	2.51	1.02	4.01	9.3
753	0	81	1	1	0	120	0	1	159	57	22.55	75	86	0.872093	4.63	5.92	1.97	0.83	3.74	10.2
754	0	79	1	1	0	216	0	0	164	65	24.17	96	90	1.06667	2.88	5.69	2.58	0.73	3.33	8
755	0	63	1	1	0	60	0	0	170	81	28	105	100	1.05	3.02	5.67	3.75	0.89	3.23	6.5
756	0	59	1	1	0	120	1	1	166	67	24.31	93	97	0.958763	3.25	5.53	0.99	1.44	3.41	12.9
757	0	53	1	1	0	180	1	1	165	66.5	24.5	88	96	0.916667	4.98	5.5	1.54	1.17	3.41	12.3
758	0	63	1	1	0	96	1	1	164	52	19.33	74	87	0.850575	2.96	5.5	0.78	1.44	3.56	14.2
759	0	67	1	1	0	192	0	0	163	51	19.2	77	87	0.885057	2.51	5.37	1.19	1.66	3.39	10
760	0	63	1	1	0	120	0	0	166	64	23.23	88	90	0.977778	2.96	5.34	1.88	1.08	3.24	8.2
761	0	72	0	1	0	36	0	0	170	85.5	29.5	113	109	1.0367	2.7	5.28	0.65	1.31	3.09	6.6
762	0	53	1	1	0	2	0	0	173	69	23.05	93	98	0.94898	3.33	5.16	1.18	0.8	3.58	7.4
763	0	64	0	1	0	120	1	0	168	61	21.61	92	89	1.03371	3.13	5.15	0.81	1.84	2.7	12.6
764	0	55	1	1	0	72	0	0	165	72	26.4	89	99.5	0.894472	8.9	5.12	1.7	0.62	3.26	8.5
765	0	66	1	1	0	24	1	1	163	79	29.73	76	85	0.894118	3.2	5.09	1.67	0.94	3.04	5.5
766	0	73	1	1	0	1	0	0	165	67	24.61	85	91	0.934066	2.87	3.82	4.17	0.69	1.86	7.1
767	0	77	0	1	0	96	0	0	155	50	20.8	86	88	0.977273	3.35	3.97	3.5	0.73	1.66	11.2
768	0	64	1	1	0	48	1	1	172	83	28	105	105	1	3.65	4.57	2.51	1.19	2.43	9.3
769	0	59	0	1	0	120	1	0	170	75	25.95	95	99	0.959596	3	3.95	2.24	0.61	2.8	8
770	0	48	1	1	0	120	0	0	168	68	24.09	78	80	0.975	3.53	3.51	2.09	0.6	1.93	15.7
772	0	63	0	1	0	180	0	1	166	69	25.04	92	96	0.958333	3.93	4.85	1.94	0.74	2.85	11.2
773	0	65	0	1	0	120	0	1	163	53	19.95	82	89	0.921348	3.08	4.47	1.92	0.95	2.87	10.7
774	0	74	1	1	0	2	0	0	156	55	22.6	84	92	0.913043	3.85	2.13	1.91	0.61	0.91	8.5
775	0	76	0	1	0	120	0	0	160	71	27.73	90	95	0.947368	7.17	4.62	1.8	0.75	3.25	13.3
776	0	81	1	1	0	120	1	0	160	58	22.66	92	97	0.948454	2.74	5.02	1.19	1.25	3.23	11.5
777	0	76	1	1	0	180	0	0	163	57	21.45	90	95	0.947368	8.41	4.78	1.51	0.87	3.23	12.3
778	0	79	0	1	0	72	1	1	153	53	22.64	80	82	0.97561	2.92	4.5	1.62	1.14	3.17	10.2
779	0	70	1	1	0	120	1	1	163	66	24.84	86	88	0.977273	5.91	4.38	1.23	0.63	3.13	12.9
780	0	69	0	1	0	84	0	0	164	77	28.6	100	101	0.990099	2.41	4.78	1.2	1.17	3.08	7.9
781	0	56	1	1	0	216	1	1	170	63.5	21.97	85	94	0.904255	3.91	4.96	0.69	1.33	3.01	12.8
782	0	47	1	1	0	60	1	1	169	83.5	29.2	96	105	0.914286	3.19	4.69	0.96	0.98	2.97	9.7
783	0	68	0	1	0	120	0	0	158	62	24.84	87	92	0.945652	6.39	4.82	1.17	1.21	2.95	9.2
785	0	75	1	1	0	120	1	1	163	62	23.34	101	99	1.0202	1.91	5.05	0.81	1.64	2.84	9
786	0	56	1	1	0	72	1	1	170	65	22.5	79	93	0.849462	4.93	4.41	1.45	0.82	2.78	6.7
787	0	54	0	1	0	240	1	0	172	80	27.04	91	104	0.875	2.93	4.47	1.3	1.02	2.71	8
788	0	70	0	1	0	36	1	1	158	56	22.43	80	86	0.930233	2.05	3.7	1.36	0.73	2.6	10.5
789	0	75	1	1	0	48	1	1	160	62	24.2	92	89	1.03371	2.32	3.97	0.64	1.63	1.86	11.8
790	0	78	1	1	0	218	1	0	168	69	24.45	95	100	0.95	8.55	4.51	1.01	1.57	2.14	11.4
792	0	74	1	1	0	180	0	0	173	64	21.38	82	86	0.953488	2.79	4.1	0.78	1.39	2.11	11.3
793	0	79	1	1	0	12	0	0	162	65	24.77	90	90	1	3.6	3.13	0.5	1.27	1.7	7.2
794	0	71	1	1	0	240	0	0	171	83	28.3	106	103	1.02913	3.37	3.09	0.56	1.26	1.46	11.5
795	0	61	1	1	0	360	1	1	172	64	21.63	92	95	0.968421	2.96	2.75	1.19	1.26	1.04	8.9
796	0	62	1	1	0	204	0	1	162	88	33.53	109	105	1.0381	2.6	3.3	0.71	1.13	1.92	6.6
797	0	66	0	1	0	48	1	1	171	68	23.26	100	96	1.04167	2.5	2.9	0.58	1.05	1.6	6.1
799	0	56	1	1	0	120	0	0	174	86.5	28.6	102	104	0.980769	2.82	3.14	0.66	1.03	1.5	6.5
800	0	85	1	1	1	120	0	1	175	77	25.14	104	101	1.0297	6.12	7.87	6.85	0.89	3.76	9.8
801	0	69	1	1	1	120	1	1	171	65	22.23	85	100	0.85	3.6	7.5	2.04	1.15	3.81	8.9
802	0	55	1	1	1	60	1	1	173	80.5	26.9	104	104	1	4.36	7.32	1.69	1.49	4.85	13
803	0	72	0	1	1	84	0	0	172	80	27.04	95	108	0.87963	2.36	6.79	3.89	1.4	4.28	9.7
804	0	70	1	1	1	192	0	0	150	53	23.56	87	87	1	2.97	6.58	10.44	0.72	1.75	13.6
805	0	61	1	1	1	180	0	0	160	64	25	90	90	1	7.57	6.58	2.97	0.91	4.11	12
806	0	83	1	1	1	84	1	0	160	58	22.66	83	87	0.954023	3.58	6.3	2.65	1.07	4.2	4.7
808	0	76	1	1	1	120	0	0	170	47	16.26	80	90	0.888889	3.2	6.1	2.2	1.59	3.12	9.4
809	0	56	1	1	1	120	0	0	165	77	22.3	99	100	0.99	3.13	6.06	2.84	1.01	3.47	7.9
810	0	68	1	1	1	132	0	1	165	68	24.98	91	93	0.978495	4.47	6.06	1.09	1.91	3.38	7.4
811	0	69	1	1	1	120	1	0	164	70	26.03	95	96	0.989583	3.04	6.05	1.35	1.21	4.31	7.6
812	0	66	1	1	1	0.33	1	0	171	75	25.65	108	98	1.10204	4.17	5.96	1.88	1.21	4.04	5.5
814	0	76	1	1	1	12	1	1	168	70	24.8	85	95	0.894737	3.4	5.78	2.81	0.92	3.18	10
815	0	59	1	1	1	120	1	0	160	55	21.48	76	82	0.926829	5.1	5.74	1.78	1.19	3.35	8.2
816	0	63	1	1	1	120	0	0	168	70	24.8	89	94	0.946809	3.94	5.68	1.87	1.12	3.94	7.5
817	0	60	1	1	1	120	1	0	172	83	28.06	95	110	0.863636	4.28	5.65	2.85	1.05	3.3	6.9
818	0	79	1	1	1	240	0	0	162	60	22.86	78	90	0.866667	2.08	5.48	0.57	2.59	3.21	7.5
819	0	62	1	1	1	108	0	0	165	69	25.34	92	98	0.938776	4.45	5.37	1.81	0.84	3.67	8.2
820	0	71	1	1	1	120	0	0	168	70	24.8	93	93	1	3.78	5.3	3.16	1.24	2.79	6.8
821	0	79	1	1	1	48	1	0	170	63	21.8	85	98	0.867347	7.64	5.25	1.12	0.9	3.65	11.3
822	0	75	1	1	1	120	1	0	161	64	24.69	88	96	0.916667	3.54	5.23	3.67	0.99	2.88	11.7
823	0	54	1	1	1	204	1	1	170	73	25.26	89	97	0.917526	2.26	5.22	1.42	0.94	3.54	10.9
824	0	66	1	1	1	180	0	1	161	54	20.83	88	90	0.977778	4.45	5.22	0.99	0.89	3.27	8.2
825	0	50	1	1	1	96	0	1	176	93.5	30.18	104	106	0.981132	5.1	5.18	2.02	0.97	3.36	10.6
826	0	61	1	1	1	120	0	0	167	71	25.5	92	94	0.978723	4.62	5.13	3.42	1.08	2.3	6.5
827	0	57	1	1	1	120	1	1	176	60	20	79	87	0.908046	3.83	5.11	1.6	1.11	2.7	13.2
828	0	51	1	1	1	12	0	1	169	57.5	20.13	63	80	0.7875	3.34	5.1	1.32	1.37	3.8	9.5
829	0	75	1	1	1	48	1	1	178	77	24.3	93	100	0.93	3.25	4.29	5.14	0.72	1.48	11.3
830	0	70	1	1	1	48	0	0	169	55.5	19.43	83	90	0.922222	2.6	2.95	2.95	0.91	1.35	7.3
831	0	75	1	1	1	240	0	0	165	66	24.24	92	95	0.968421	4.02	4.42	2.7	1.2	2.07	10.2
832	0	51	1	1	1	144	1	1	174	67	22.12	80	75	1.06667	3.17	4.61	2.49	1.02	2.33	8.1
833	0	75	1	1	1	120	1	0	171	76	25.9	100	90	1.11111	4.74	4.61	2.39	1.02	2.12	7.5
834	0	80	1	1	1	192	1	0	163	74.5	28	79	96	0.822917	4.16	3.62	2.33	0.73	1.91	7.8
835	0	78	1	1	1	196	0	0	170	64	22.15	90	98	0.918367	5.32	4.84	2.28	0.8	3.16	13.3
836	0	77	1	1	1	360	1	0	171	94	32.1	90	105	0.857143	8.16	3.56	2.22	0.68	1.71	8.7
837	0	63	1	1	1	156	0	1	168	70	24.8	100	97	1.03093	3.56	3.97	2.12	0.8	2.1	7.6
838	0	72	0	1	1	240	0	0	166	59	21.41	90	95	0.947368	5.01	2.9	2.08	0.81	1.45	9.8
839	0	62	1	1	1	168	1	1	165	60	22.04	88	95	0.926316	4.41	3.66	2.07	0.86	2.04	7.7
840	0	82	1	1	1	120	0	0	160	40	15.63	63	70	0.9	2.56	4.09	1.96	1.01	2.08	8.3
841	0	77	1	1	1	72	1	1	170	55	19.03	86.5	93.5	0.925134	3.25	3.47	1.93	0.9	1.66	14.4
842	0	63	1	1	1	180	0	0	165	81	29.8	105	100	1.05	4.31	5.03	1.92	1.08	2.9	9.3
843	0	55	1	1	1	24	0	0	163	67	25.19	78	85	0.917647	3.58	5.06	1.86	0.73	3.23	5.9
844	0	72	1	1	1	24	0	0	165	56	20.57	80	94	0.851064	3.91	3.44	1.75	0.79	2.17	6.3
845	0	54	1	1	1	48	0	1	167	66	23.67	86	90	0.955556	5.16	3.45	1.7	0.74	1.99	11.7
846	0	50	1	1	1	60	0	0	170	70.5	24.39	96	86	1.11628	2.62	3.03	1.7	0.86	1.5	11.1
847	0	90	1	1	1	6	0	0	163	55	20.7	87	88	0.988636	8.83	5.07	1.3	0.79	3.59	8.3
848	0	73	1	1	1	1	0	0	158	63	25.24	90	100	0.9	7.42	4.87	1.22	0.91	3.36	7.8
849	0	52	1	1	1	0.5	1	1	164	58	21.56	76	87	0.873563	5.31	4.5	0.76	0.77	3.32	7.2
850	0	73	1	1	1	60	0	0	163	67	25	90	95	0.947368	4.45	4.7	1.45	0.86	2.99	8.5
851	0	45	1	1	1	48	0	0	175	79	25.8	97	101	0.960396	6.13	4.78	0.96	1	2.92	6.8
852	0	52	1	1	1	120	1	0	167	52.5	18.82			#DIV/0!	8.58	4.29	0.85	1.03	2.91	12.6
853	0	67	1	1	1	240	1	0	168	67	23.74	86	93	0.924731	3.91	4.7	1.53	1.33	2.8	11.3
855	0	36	1	1	1	1	1	1	165	61	22.41	80	81	0.987654	6.01	4.56	1.36	0.88	2.78	9.6
856	0	66	1	1	1	60	1	1	172	74.5	25.18	96	101	0.950495	2.95	4.59	1.5	1.31	2.71	11.9
857	0	69	1	1	1	240	1	1	158	57.5	23	85	90	0.944444	3.23	4	1.02	1.68	2.1	7.7
858	0	76	0	1	1	6	1	1	165	70	25.71	96	92	1.04348	3.86	4.47	1.09	1.66	1.86	8.6
859	0	62	1	1	1	60	1	1	163	59	22.2	79	96	0.822917	3.96	3.49	0.77	1.59	1.32	9.2
860	0	58	1	1	1	1	1	0	164	76	28.3	87	94	0.925532	3.31	3.81	0.55	1.54	1.81	6.6
861	0	51	1	1	1	84	1	1	163	65	24.5	80	86	0.930233	5.07	3.12	1.04	1.49	1.17	7.4
862	0	63	1	1	1	120	0	0	162	61	23.2	98	99	0.989899	4.06	4.65	1.59	1.43	2.07	6.7
863	0	66	1	1	1	12	0	1	162	59	22.48	86	83	1.03614	3.82	4.7	1.5	1.39	2.55	12.8
864	0	73	1	1	1	204	1	1	154	62.5	26.4	102	87	1.17241	3.93	4.21	0.85	1.36	2.3	8.7
865	0	69	0	1	1	216	0	0	170	75.5	26.12	102	98	1.04082	4.23	3.23	1.43	1.23	1.27	10.1
866	0	82	1	1	1	240	1	0	170	58	20.1	81	87	0.931034	4.31	3.37	1.24	1.11	1.8	9.6
867	0	79	1	1	1	12	1	0	172	78	26.37	112	105	1.06667	4.07	3.24	0.98	1.08	2.1	10.2
868	0	79	1	1	1	240	1	0	175	64	20.89	95	105	0.904762	6.74	3.79	1.25	1.08	1.95	5.9
869	0	64	1	1	1	6	1	1	153	46	19.65	68	70	0.971429	4.6	4.3	0.97	1.05	2.16	10.9
870	0	59	1	1	1	60	1	1	174	51.5	17			#DIV/0!	5.79	4.14	1.17	1.03	2.33	6.1
871	1	69	1	1	0	120	0	0	158	54	21.6	80	88	0.909091	4.88	3.82	1.33	1.25	1.92	6.4
872	1	69	1	1	0	120	0	0	144	52	25	80	86	0.930233	2.68	3.91	1.2	1.23	1.86	10
873	1	72	1	1	0	120	0	0	163	75	28.23	119	108	1.10185	3.61	3.27	0.71	1.2	1.71	9.9
874	1	80	1	1	0	240	0	0	146	54	25.3	95	100	0.95	2.98	2.9	0.88	1.1	1.23	9.9
875	1	77	1	1	0	120	0	0	150	60.5	26.89	101	95	1.06316	3.78	3.83	0.6	1.01	2.32	10.7
876	1	79	1	1	0	192	0	0	146	59	27.68	85	90	0.944444	2.37	3.06	0.76	0.98	1.72	10.1
877	1	63	1	1	0	36	0	0	145	57	27	80	89	0.898876	4.4	3.4	1	0.96	1.87	9.1
878	1	69	0	1	0	240	0	0	148	58	26.48	86	93	0.924731	4.16	3.07	0.93	0.93	2	8
879	1	78	1	1	0	72	0	0	147	51.5	23.83	76	85	0.894118	2.87	3.65	0.9	0.86	2.21	6.6
880	1	76	1	1	0	240	0	0	147	56	25.92	80	90	0.888889	4.91	3.58	1.55	0.84	1.88	6.2
881	1	75	1	1	0	180	0	0	145	60.5	28.78	81	100	0.81	3.33	3.77	1.1	0.73	2.26	7.3
882	1	70	1	1	1	360	0	0	144	53	25.56	96	104	0.923077	2.58	3.6	1.63	1.24	2	10.8
883	1	49	1	1	1	120	0	0	160	60	23.44	89	95	0.936842	3.05	3.01	0.91	1.23	0.83	10.4
884	1	62	1	1	1	96	0	0	155	48	19.98	108	98	1.10204	6.04	4.24	0.75	1.2	2.53	9.8
885	1	74	1	1	1	204	0	0	162	67.5	25.72	94	95	0.989474	3.54	4.12	0.81	1.19	2.35	6.7
886	1	69	1	1	1	108	0	0	130	53.5	31.5	85	98	0.867347	4.01	3.68	1	1.18	1.85	7
887	1	71	1	1	1	240	0	0	155	44	18.31	80	90	0.888889	5.01	3.62	0.82	1.14	1.91	7.2
888	1	76	0	1	1	120	1	1	144	56	27	83	94	0.882979	3	4.11	1.54	1.13	2.33	7.5
890	1	65	1	1	1	216	0	0	155	63	26.2	103	103	1	3.46	4.31	1.48	1.11	2.59	7.9
891	1	65	1	1	1	120	0	0	160	70	27.34	96	96	1	4.06	3.1	1.25	1.09	1.33	11.1
892	1	56	1	1	1	156	0	0	156	55.5	22.81	83	91	0.912088	4.3	3.82	1.47	1.08	2.34	6.3
893	1	67	1	1	1	120	0	0	155	65	27	97	99	0.979798	4.57	4	0.87	1.07	2.13	9.4
894	1	70	1	1	1	240	0	0	151	53	23.2	93	98	0.94898	4.45	2.8	0.51	1.06	1.7	7.8
895	1	70	1	1	1	240	0	0	154	64	26.99	95	100	0.95	3.14	4.71	1.68	1.05	2.53	7.2
897	1	70	1	1	1	132	0	0	158	59	23.63	93	89	1.04494	3.45	4.12	1.11	1.04	2.4	11.1
898	1	60	1	1	1	120	0	0	155	70	29.1	104	105	0.990476	3.61	4.43	1.68	1.02	2.42	7.6
899	1	62	0	1	1	120	0	0	155	64.5	26.8	102	104	0.980769	2.9	2.75	0.85	0.99	1.36	8.8
900	1	59	1	1	1	156	0	0	148	83	26.2	91	100	0.91	4.65	4.2	1.59	0.98	2.48	9.5
901	1	72	1	1	1	96	0	0	157	69	27.2	92	103	0.893204	5.76	3.89	0.9	0.98	2.47	7.5
902	1	54	1	1	1	120	0	0	153	52	22.2	70	63	1.11111	4.49	3.06	1.15	0.96	1.58	6.5
903	1	64	1	1	1	240	0	0	157	61	24.75	95.5	92	1.03804	4.56	3.75	0.77	0.93	2.42	9.4
904	1	77	1	1	1	120	0	0	160	75	29.3	92	93	0.989247	7.32	3.01	0.66	0.92	1.64	6.6
905	1	82	1	1	1	60	0	0	158	57	22.8	90	90	1	3.27	3.32	1.17	0.91	1.94	8.5
906	1	87	1	1	1	0.67	0	0	150	52.5	23.33	85	85	1	2.66	1.92	0.56	0.87	0.81	6.8
907	1	48	1	1	1	180	0	0	158	52	20.83	84	95	0.884211	2.41	3.8	0.7	0.84	2.52	8.1
908	1	80	1	1	1	120	0	0	146	55	25.8	92	90	1.02222	3.5	3.64	1.46	0.78	2.44	8
909	1	67	1	1	1	108	0	0	160	59	23.05	84	96	0.875	3.3	3.5	1.08	0.74	2.08	11.7
910	1	75	0	1	1	240	0	0	159	67	26.5	118	111	1.06306	7.01	3.11	0.68	0.72	1.96	7.6
911	1	67	1	1	1	36	0	0	154	55.5	23.4	77	94	0.819149	4.19	2.41	1.16	0.71	1.25	9.8
912	1	66	1	1	0	60	0	0	160	63	24.61	86	94	0.914894	5.03	8.85	1.45	1.02	5.89	12.5
913	1	64	1	1	0	96	0	0	156	54.5	22.39	77	86	0.895349	3.41	6.8	1.62	1.25	4.89	9.2
914	1	66	1	1	0	120	0	0	140	45	22.96	78	88	0.886364	2.9	6.78	3.47	1.07	3.82	11.6
915	1	65	0	1	0	12	0	0	150	56	24.89	101	110	0.918182	3.04	6.63	10.7	0.66	1.67	9.8
916	1	59	0	1	0	120	0	0	158	50	20.02	84	89	0.94382	3.71	6.27	1.01	1.49	3.79	6.4
917	1	75	1	1	0	156	0	0	151	58	25.44	101	91	1.10989	3.41	6.17	1.95	1.21	4.06	10.6
918	1	82	1	1	0	120	0	0	162	54.5	20.77	85	95	0.894737	7.07	6.07	1.6	0.76	4.08	8.1
919	1	51	1	1	0	240	0	0	155	61	25.39	82	92	0.891304	3.55	5.72	2.49	1.32	3.41	7.7
920	1	64	0	1	0	96	0	0	161	66	25.48	86	92	0.934783	3.23	5.67	2.25	0.94	3.34	9.3
921	1	56	0	1	0	60	0	0	155	58	24.1	87	97	0.896907	3.94	5.43	1.42	1.07	3.59	9.6
922	1	68	1	1	0	156	0	0	155	72	29.97	110	100	1.1	3.8	5.39	0.99	1.29	3.48	6.9
923	1	72	1	1	0	108	0	0	145	55	26.16	97	97	1	3.02	5.35	0.5	1.58	2.79	8.3
924	1	64	1	1	0	120	0	0	158	79	31.65	113	105	1.07619	2.42	5.29	0.98	1.12	3.34	14.2
925	1	60	0	1	0	240	0	0	153	53	22.64	88	89	0.988764	2.54	5.25	1.16	0.89	3.71	10
926	1	66	1	1	0	36	0	0	155	79.5	33.09	113	118	0.957627	2.56	5.23	2.54	1	3.07	9.5
927	1	45	1	1	0	84	0	1	165	72	26.45	96	105	0.914286	3.8	5.23	1.19	1	3.08	9.4
928	1	54	1	1	0	144	1	0	162	49	18.67	70	88	0.795455	3.38	4.71	18	0.71	2.91	12.4
929	1	57	1	1	0	250	0	0	156	56.5	23.2	77	87	0.885057	3.6	4.1	4.76	0.83	1.9	8.4
930	1	73	0	1	0	216	1	1	149	55	24.77	83	85	0.976471	3.84	4.43	4.26	0.73	2.05	11.1
931	1	64	1	1	0	120	0	0	164	64	23.8	91	98	0.928571	3.27	4.57	3.29	0.83	2.22	7.7
933	1	55	0	1	0	96	0	0	163	88	33.1	108	104	1.03846	3.67	4.99	2.58	1.02	2.97	8.8
934	1	78	0	1	0	72	0	0	148	58	26.48	93	100	0.93	3.17	5.07	2.37	1.42	2.85	8.7
935	1	66	0	1	0	324	0	0	152	92	39.8	125.5	121	1.03719	2.97	4.8	1.98	0.97	3.6	10.7
936	1	60	1	1	0	1	0	0	156	59	24.24	80	93	0.860215	5.59	2.89	1.72	0.68	1.73	12.1
937	1	67	1	1	0	240	0	0	163	63.5	23.9	93	96	0.96875	3.96	4.7	1.59	0.86	3.4	8.1
938	1	67	1	1	0	48	0	0	159	62	24.5	95	104	0.913462	2.3	4.94	1.01	0.95	3.3	7
939	1	66	1	1	0	252	0	0	148	62	28.31	92	10	9.2	5.57	4.34	0.77	0.98	3.11	14.7
940	1	67	1	1	0	572	0	0	158	65	26	92	97	0.948454	6.58	4.35	1.41	0.75	3.06	9.8
941	1	50	0	1	0	144	0	0	155	42	17.48	70	88	0.795455	3.04	4.56	0.83	0.94	2.98	11
942	1	61	1	1	0	240	0	0	160	65	25.39	85	82	1.03659	3.39	4.27	1.58	0.81	2.76	7.9
943	1	73	0	1	0	120	0	0	160	75	29.3	90	85	1.05882	2.94	4.76	0.73	1.48	2.74	6
944	1	53	1	1	0	180	0	0	162	56	21.3	84	93	0.903226	3.38	4.49	1.24	0.95	2.62	9.8
945	1	60	0	1	0	120	0	0	158	62.5	25	90	94	0.957447	2.73	3.89	0.55	1.47	2.06	14.9
947	1	74	0	1	0	12	0	0	160	72.5	28.3	112	108	1.03704	3.47	4.24	1.13	1.37	2.19	5.6
948	1	70	0	1	0	60	0	0	156	53	21.78	85	94	0.904255	2.41	3.29	0.47	1.34	1.69	10.5
949	1	62	1	1	0	240	0	0	158	72	29	85	98	0.867347	3.64	3.87	1	1.32	2.04	6.8
950	1	61	1	1	0	84	0	0	165	51	19.9	84	89	0.94382	4.66	2.43	1.29	0.84	0.99	6.7
951	1	70	1	1	0	36	0	0	160	65	25.4	92	98	0.938776	3.56	2.13	1.49	0.8	0.95	6.9
953	1	82	0	1	1	3	1	1	148	58	26.48	80	85	0.941176	4.9	10.54	2.02	1.35	7.5	6.7
954	1	64	1	1	1	120	0	0	155	59	24.6	81	81	1	6.38	9.24	5.06	1.17	5.27	7.8
955	1	76	1	1	1	360	0	0	145	46	21.88	67	78	0.858974	3.23	8.26	1.76	1.13	6.01	13.6
956	1	65	1	1	1	12	0	0	159	53	20.96	82	93	0.88172	3.15	7.88	9.24	1	2.51	11.6
957	1	74	1	1	1	120	0	0	152	59	25.54	105	98	1.07143	4.81	7.54	4.12	0.87	4.32	8.8
958	1	76	0	1	1	240	0	0	154	60	25.3	86	91	0.945055	3.06	7.24	2.62	1.35	4.58	10.5
959	1	64	1	1	1	120	0	0	158	59	23.6	94	103	0.912621	3.7	7.18	2.29	0.95	4.54	8.9
960	1	72	1	1	1	240	0	0	151	51.5	22.59	86	84	1.02381	2.86	7.12	3.51	0.9	4.56	8.8
961	1	64	1	1	1	144	0	0	158	62	24.8	85	87	0.977011	2.76	6.58	1.89	1.16	4.24	8.4
962	1	66	1	1	1	120	0	0	148	74	33.8	108	108	1	2.86	6.41	1.61	1.21	4.49	9.5
963	1	73	1	1	1	180	0	0	151	55	24.12	96.5	97.5	0.989744	5.9	6.06	3.47	0.96	1.84	9.1
964	1	58	1	1	1	240	0	0	160	64.5	25.2	91	92	0.98913	4.46	5.98	2.57	1.03	3.62	11.7
965	1	71	1	1	1	12	0	0	149	45	20.27	76	78	0.974359	3.51	5.89	3.56	0.88	3.38	8.2
966	1	61	1	1	1	204	0	0	158	53	21.23	86	93	0.924731	3.07	5.89	1.69	1.31	3.61	6.6
967	1	79	1	1	1	120	0	0	144	57	27.49	92	100	0.92	3.94	5.85	1.47	1.29	4.07	7.4
968	1	71	1	1	1	120	0	0	154	65	27.41	86	89	0.966292	8.3	5.79	3.19	0.62	3.26	7.8
969	1	81	1	1	1	120	0	0	165	62.5	22.96	82	85	0.964706	4.43	5.75	0.69	1.51	3.54	6.4
970	1	60	1	1	1	96	0	0	150	46	20.44	76	87	0.873563	3.94	5.7	3.15	1.04	3.11	7.9
971	1	67	0	1	1	180	0	0	163	60	22.58	91	91	1	4.19	5.7	2.58	0.8	4.1	8.4
972	1	47	1	1	1	96	0	0	163	87	32.74	115	177	0.649718	8.29	5.7	1.66	1.05	3.76	9
973	1	57	1	1	1	120	0	0	158	65	26.04	99	124	0.798387	3.51	5.61	1.49	0.7	4.48	6.5
974	1	73	1	1	1	300	0	0	156	53	21.8	84	93	0.903226	7.44	5.6	3.96	0.94	3.2	8
975	1	70	1	1	1	120	0	0	156	65	26.7	103	94	1.09574	4.17	5.55	4.6	0.81	3.16	10.9
976	1	51	1	1	1	3	0	0	147	50.5	23.4	85	88	0.965909	2.93	5.52	3.5	1.07	2.64	8.8
977	1	64	1	1	1	180	0	0	149	43	19.37	76	80	0.95	6.81	5.5	1.28	0.79	4.6	9.4
978	1	69	1	1	1	144	0	0	141	59	29.68	100	102	0.980392	3.38	5.48	2.02	0.93	3.9	7.4
979	1	52	1	1	1	0.25	0	0	158	69.5	27.84	99	113	0.876106	5.63	5.47	3.57	0.94	3.23	14.2
980	1	55	1	1	1	12	0	0	162	57	21.72	82	90	0.911111	3.49	5.46	2.92	0.91	3.19	14.7
981	1	73	1	1	1	192	0	0	165	70	25.71	100	105	0.952381	2.89	5.45	1.98	0.87	3.56	9.2
982	1	62	1	1	1	84	0	0	150	50	22.22	96	98	0.979592	2.76	5.4	3.21	1.04	2.55	11.5
984	1	73	0	1	1	84	0	0	150	56	24.89	90	92	0.978261	5.26	5.25	2.03	1.02	3.43	7
985	1	68	1	1	1	120	0	0	158	60	24.03	90	96	0.9375	2.72	5.18	1.68	0.89	3.54	14
986	1	79	1	1	1	240	0	0	155	56	23.3	80	88	0.909091	5.85	5.16	1.35	1.12	3.1	7.5
987	1	85	1	1	1	120	0	0	157	65	26.37	89	97	0.917526	2.75	5.13	2.83	1.08	2.72	8
988	1	72	0	1	1	60	0	0	144	46	22.18	88	89	0.988764	3.01	4.95	6.69	0.79	1.86	10.9
989	1	79	1	1	1	180	0	0	154	58	24.46	104	97	1.07216	3.3	4.41	5.35	0.75	1.66	9.9
990	1	67	1	1	1	120	0	0	162	61	23.24	92	100	0.92	3.19	4.24	2.91	0.82	2.45	7.3
991	1	61	1	1	1	228	0	0	150	53	23.56	90	93	0.967742	6.84	4.13	2.79	0.85	1.95	8.6
992	1	67	1	1	1	96	0	0	157	60	24.3	94	95	0.989474	3.19	3.28	2.77	0.72	1.38	9.5
993	1	74	1	1	1	60	0	0	150	60	26.6	95	105	0.904762	3.91	3.98	2.39	0.78	2.03	9
994	1	57	1	1	1	120	0	0	158	57	22	88	96	0.916667	2.93	2.94	2.33	1.26	1.08	7.7
995	1	70	1	1	1	36	0	0	153	68	29.05	95	103	0.92233	2.85	4.72	2.1	1.4	2.62	9.2
996	1	54	1	1	1	240	0	0	158	62	24.83	86	97	0.886598	8.27	4.24	2.02	0.87	2.63	12.5
997	1	73	0	1	1	300	0	0	163	82	30.86	134	120	1.11667	5.1	0.88	1.92	1.92	3.13	7.7
998	1	74	1	1	1	120	0	0	156	47	19.31	83	89	0.932584	4.73	4.24	1.89	1.2	1.84	9.3
999	1	64	1	1	1	144	0	0	155	71	29.6	98	98	1	2.66	4.84	1.87	0.91	2.93	10.1
1000	1	53	1	1	1	72	0	0	155	49	20.4	75	80	0.9375	4.1	4.65	1.84	0.87	3.12	10.8
1001	1	66	1	1	1	96	0	0	153	57	24.35	85	88	0.965909	3.18	3.02	1.83	1.02	1.52	7.6
1002	1	69	1	1	1	108	0	0	150	65	28.89	106	108	0.981481	3.17	4.8	1.71	1.06	3.3	9.2
1004	1	49	1	1	1	1	0	0	159	58	22.94	74	92	0.804348	3.73	4.9	0.87	1.39	4.07	9.9
1005	1	57	1	1	1	36	0	0	158	64	25.64	91	100	0.91	4.43	4.93	1.65	1.06	3.28	8.8
1006	1	70	1	1	1	48	0	0	152	52	22.51	83.5	93	0.897849	3.09	4.4	1.33	1.12	3.2	8.6
1007	1	71	1	1	1	24	0	0	152	56	24.24	85	90	0.944444	6.3	4.75	1.17	1.01	3.07	9.7
1008	1	70	1	1	1	84	0	0	150	63	28	85	94	0.904255	7.01	4.33	0.99	0.76	2.93	10.8
1009	1	60	1	1	1	96	0	0	151	54	23.68	84	90	0.933333	4.6	4.65	0.92	1.11	2.86	8.6
1010	1	68	1	1	1	240	1	1	155	54	22.48	87	89	0.977528	3.23	4.68	1.65	1	2.83	9
1011	1	64	1	1	1	60	0	0	157	49.5	20.1	77	91	0.846154	4.56	4.57	1	1.22	2.71	5.8
1012	1	76	1	1	1	84	0	0	149	47.5	21.4	83	83	1	2.54	3.97	1.36	1.03	2.7	5.8
1013	1	54	1	1	1	96	0	0	150	43.5	19.33	99	101	0.980198	3.83	4.65	1.37	0.96	2.69	11.7
1014	1	73	1	1	1	240	0	0	148	47	21.46	88	88	1	2.31	4.6	1.14	1.85	2.4	6.8
1015	1	59	0	1	1	72	0	0	152	66	28.6	90	95	0.947368	3.35	3.73	0.52	1.64	1.53	6.1
1016	1	70	0	1	1	120	0	0	149	68	30.63	97	103	0.941748	5.97	3.97	1.21	1.44	1.6	12.9
1018	1	67	1	1	1	180	0	0	145	55	26.16	94	93	1.01075	3.77	3.91	0.76	1.29	2.05	8.3
1019	1	56	0	1	1	120	0	0	155	51	21			#DIV/0!	4.11	3.73	0.98	1.19	2.08	9
1020	1	54	1	1	1	36	0	0	163	60	22.58	102	110	0.927273	3.8	3.7	0.68	1.17	1.74	9.4
1021	1	57	0	1	1	180	0	0	152	57	24.7	84	86	0.976744	3.36	3.12	1.45	1.09	1.19	9
1022	1	67	1	1	1	144	0	0	157	59	23.94	80	90	0.888889	2.61	3.59	1.56	1.01	1.87	7.1
1023	1	72	1	1	1	240	0	0	158	74.5	29.84	109	109	1	2.59	3.06	1.31	0.91	1.48	8.5
1024	1	82	1	1	1	192	0	0	148	48	21.9	78	98	0.795918	6.14	2.68	1.11	0.82	1.08	7.7
1025	0	58	1	1	0	24	0	0	170	56	19.37	82	92	0.891304	3.42	3.8	1.22	0.93	2.14	6.2
1026	0	75	1	1	1	120	0	0	168	72	25.51	99	112	0.883929	4.55	3.33	0.88	0.97	2.06	10
1027	0	70	1	1	1	216	1	0	167	67	24.02	89	90	0.988889	1.79	3.23	1.2	0.83	1.74	9.7
1028	0	70	1	1	1	360	1	0	170	86.5	29.93	103	100	1.03	7.61	3.84	1.17	0.72	2.57	11.7
1029	0	61	1	1	0	120	0	0	164	72	26.8	95	102	0.931373	3.74	5.59	1.18	1.97	2.75	12.4
1030	0	50	0	1	0	156	0	0	172	95	32.1	112	104	1.07692	2.34	5.47	2.96	1.13	3	9.2
1031	0	58	0	1	0	228	0	0	170	70	24.22	95	92	1.03261	6.65	5.46	0.94	0.88	4.09	10.3
1032	0	66	0	1	0	48	0	0	174	60	19.8	85	98	0.867347	2.28	5.1	1.08	1.29	3.23	10
1033	0	79	1	1	0	36	0	0	165	69	25.34	95	105	0.904762	4.28	3.91	1.98	0.75	2.6	11.3
1034	0	58	1	1	0	360	1	0	166	75	27.2	99	95	1.04211	2.88	4.69	1.82	1.07	2.86	8.8
1036	0	55	1	1	0	120	0	0	166	66	23.9	92	94	0.978723	5.34	4.66	1.44	0.88	2.87	9.2
1037	0	68	1	1	0	60	0	0	178	69	21.8	90	100	0.9	4.7	4.21	1.09	0.79	2.73	7.4
1038	0	57	1	1	0	0.67	1	1	165	70	25.7	95	95	1	2.33	4.2	1.33	1.01	2.67	11.5
1039	0	80	1	1	0	120	1	0	160	55	21.48	92	99	0.929293	3.57	3.89	0.81	1.61	2.12	9.2
1040	0	61	1	1	0	120	1	0	160	70	27.34	90	95	0.947368	5.74	4.73	1.23	1.22	2.57	10.4
1041	0	80	1	1	0	2	1	1	170	63	21.8	85	90	0.944444	4.87	4.38	1.33	1.17	2.46	8.1
1042	0	63	1	1	0	240	1	1	168	70	24.8	89	89	1	3.77	4.27	1.03	1.13	2.55	11
1043	0	74	1	1	1	120	0	0	167	66.5	23.84	97	93	1.04301	2.77	7.79	1.05	1.7	5.01	8.3
1044	0	68	1	1	1	84	0	1	164	69	25.6	101	97	1.04124	5.9	6.83	1.83	1.28	4.42	6.2
1045	0	75	1	1	1	1	0	0	167	79	28.33	101	100	1.01	4.89	6.7	3.16	0.96	4.6	9
1046	0	51	1	1	1	240	1	0	162	65	24.77	98	99	0.989899	3.76	6.01	0.86	1.43	3.65	7.4
1047	0	78	1	1	1	144	1	1	171	70	23.94	102	98	1.04082	4.76	5.48	1.31	1.07	3.59	8.5
1048	0	70	1	1	1	12	1	0	166	75.5	27.4	102	110	0.927273	4.51	5.46	1.23	0.94	3.37	8.4
1049	0	58	1	1	1	120	0	0	164	62	23	86	90	0.955556	3.31	3.5	4.36	0.69	1.49	11.4
1050	0	84	1	1	1	72	0	0	170	85	29.41	85	88	0.965909	3.31	4.03	2.61	0.83	1.9	8.3
1051	0	57	1	1	1	120	0	0	170	80	27.7	105	106	0.990566	3.27	3.21	2.53	0.9	1.45	8.6
1052	0	47	1	1	1	60	1	0	170	68	23.53	92	98	0.938776	5.63	4.79	2.45	0.9	3.19	7.2
1053	0	65	1	1	1	204	1	0	168	62	22	91	95	0.957895	3.74	4.74	2.02	0.8	2.53	7.1
1054	0	49	1	1	1	72	0	0	178	80	25.25	88	100	0.88	3.83	4.52	0.41	1.28	2.63	6.8
1055	0	58	1	1	1	72	0	0	162	47	17.91	66	86	0.767442	4.23	5.05	1.39	1.86	2.53	8.8
1056	0	89	1	1	1	120	0	0	169	47	16.46	71	87	0.816092	4.26	3.6	0.51	1.62	1.9	4.9
1057	0	54	1	1	1	60	1	0	164	67	24.91	100	96	1.04167	4.72	2.95	0.92	1.09	1.36	7.1
1058	0	62	1	1	1	84	0	0	168	74	26.22	97	95	1.02105	5.97	3.69	0.61	1.08	2.17	9.4
1059	0	48	1	1	1	120	1	1	170	65	22.49	82	90	0.911111	2.83	3.68	0.51	1.07	2.33	7.5
1060	0	59	0	1	1	60	1	1	166	70	25.4	98	96	1.02083	5.1	4.74	0.75	1.06	2.46	6.9
1061	1	82	0	1	0	36	1	1	150	60	26.67	120	140	0.857143	2.94	3.39	0.69	1.17	1.8	6.2
1062	1	60	1	1	0	120	0	0	154	63	26.56	90	100	0.9	4.85	3.56	0.55	1.12	2.23	8.4
1063	1	68	1	1	0	120	0	0	160	69	27	106	99	1.07071	2.87	3.5	1.2	0.89	2.2	5.2
1064	1	74	1	1	0	120	1	1	155	52	21.64	85	95	0.894737	4.48	2.6	0.67	0.61	1.64	12.1
1065	1	70	1	1	0	240	0	0	162	61	23.24	88	93	0.946237	7.67	1.85	1	0.5	0.95	8.8
1066	1	57	0	1	1	0.5	0	0	160	57	22.2	101	105	0.961905	2.95	3.3	0.84	1.25	1.54	6.9
1067	1	73	1	1	1	240	0	0	155	65	27.06	87	90	0.966667	3.74	3.56	0.83	1.22	1.96	14
1068	1	74	1	1	1	48	0	0	160	64	25	100	104	0.961538	6.16	3.45	1.48	1.2	1.41	14
1069	1	56	1	1	1	96	0	0	157	70.5	28.6	89	99	0.89899	4.03	4.46	0.98	1.14	2.47	7.2
1070	1	64	1	1	1	72	0	0	156	52	21.37	77	80	0.9625	3.48	4.09	0.8	1.13	2.51	5.3
1072	1	62	1	1	1	60	0	0	162	75	28.58	100	107	0.934579	4.3	4.4	0.99	0.92	2.45	7.5
1073	1	52	1	1	1	72	0	0	160	75	29	103	106	0.971698	3.21	3.91	1.67	0.92	2.42	7.4
1074	1	58	0	1	1	120	0	0	154	60	25.3	89	95	0.936842	2.59	3.9	0.95	0.9	2.51	11.6
1075	1	87	1	1	1	240	0	0	150	32	14.22	65	78	0.833333	3.19	3.88	1.51	0.72	2.29	11.5
1076	1	74	1	1	0	180	0	0	157	67	27	95	104	0.913462	3.15	7.54	0.82	1.45	5.09	7.3
1077	1	83	1	1	0	108	0	0	147	46	21.29	91	95	0.957895	3.29	7.34	0.77	3.22	1.75	12.2
1078	1	58	1	1	0	3	0	0	150	46	20.4	82	84	0.97619	4	6.12	2.53	0.7	4.11	8.4
1079	1	79	1	1	0	1.5	0	0	149	51	22.7	101	105	0.961905	3.15	5.77	3.76	1.19	3.14	9
1080	1	57	1	1	0	120	0	0	156	53	21.78	75	89	0.842697	3.3	5.64	0.7	1.91	3.07	10.5
1081	1	60	1	1	0	120	0	0	150	46.2	20.5	80	90	0.888889	4.76	5.23	2.08	0.63	3.16	11.5
1082	1	53	1	1	0	36	0	0	155	54	22	89	90	0.988889	3.04	5.1	4.36	0.8	1.85	8.7
1083	1	51	1	1	0	60	0	0	165	71	26.08	95	100	0.95	2.83	4.61	4.47	0.73	2.22	8.9
1084	1	74	1	1	0	120	1	1	149	67	30.18	100	120	0.833333	4.96	4.8	0.74	1.23	3.3	7.9
1085	1	69	1	1	0	24	0	0	165	76	27.92	110	97	1.13402	3.84	4.44	1.13	1.08	2.84	9.3
1086	1	58	1	1	0	1	0	0	156	64.5	26.5	100	100	1	3.71	4.43	1.54	0.87	2.72	9.4
1088	1	81	1	1	0	240	0	0	153	58	24.78	80	100	0.8	1.89	3.6	0.61	1.5	1.82	7.7
1090	1	60	1	1	0	120	0	0	159	56	22.15	84.5	93	0.908602	2.18	3.73	1.16	1.33	2.35	9.8
1091	1	75	1	1	1	60	0	0	146	44	20.64	78	82	0.95122	2.95	3.89	1.69	1.34	1.74	6.8
1092	1	59	0	1	1	12	0	0	160	65	25	88	90	0.977778	4	6.26	5.26	0.87	3.12	11.3
1093	1	66	1	1	1	12	0	0	150	54	24	85	85	1	3.36	6.07	1.8	1.2	3.85	8.5
1094	1	55	1	1	1	180	0	0	160	47	18.36	74	88	0.840909	5.05	5.81	8.48	0.73	1.66	6.7
1095	1	68	1	1	1	120	0	0	158	71	28.4	98	99	0.989899	5	5.37	2.13	1.24	3.28	8.1
1096	1	64	1	1	1	84	0	0	152	68	29.43	106	113	0.938053	3.49	5.18	0.98	1.44	3.55	7.5
1097	1	87	1	1	1	84	0	0	150	65	28.89	94	97	0.969072	4.21	5.09	2.1	1.09	2.98	8.9
1098	1	63	1	1	1	156	0	0	156	73	30	104	100	1.04	3.11	5.05	3.57	0.94	1.8	13.2
1099	1	69	1	1	1	24	0	0	155	69	28.7	101.5	101.5	1	3.63	4.14	2.71	1.13	2.03	6.9
1100	1	66	0	1	1	108	0	0	155	53	22	86	95	0.905263	2.83	4.58	2.58	0.88	2.45	7.9
1101	1	69	1	1	1	120	0	0	157	67	27.18	99	103	0.961165	3.53	4.93	2.21	0.92	2.63	6.7
1102	1	66	1	1	1	120	0	0	158	55	22.03	100	110	0.909091	2.91	4.13	2.12	0.72	2.55	10.9
1103	1	71	1	1	1	72	0	0	150	40	17.78	80	85	0.941176	3.66	4.24	2.05	1.13	2.24	9.2
1104	1	65	0	1	1	144	0	0	155	54	22.48	88	91	0.967033	2.24	3.1	1.88	1.09	1.6	6.8
1105	1	59	0	1	1	240	0	0	155	53.5	22.27	89	93	0.956989	2.52	4.76	1.78	1.58	2.3	8.7
1106	1	70	1	1	1	240	0	0	140	49	30.1	96	100	0.96	6.9	4.94	1.4	0.68	3.29	6.1
1107	1	81	1	1	1	360	0	0	154	58	24.5	92	92	1	5.72	4.63	1.55	0.79	2.97	9.7
1108	1	74	1	1	1	96	1	1	150	45	20	90	100	0.9	3.45	4	1.44	0.95	2.9	8.8
1109	1	76	1	1	1	240	0	0	160	60	23.4	92	96	0.958333	5.33	3.97	1.01	0.76	2.72	7.7
1110	1	72	1	1	1	120	0	0	161	65	25.08	88	90	0.977778	3.94	4.62	1.28	1.24	2.71	11.2
1112	1	58	1	1	1	360	0	0	158	53	21.2	82	93	0.88172	2.87	2.32	1.46	0.46	1.36	6.7
1113	0	81	1	1	1	24	0	0	158	57	22.83	80	90	0.888889	6.39	4.23	1.35	1.27	2.31	9.9
1114	0	72	1	1	1	204	1	1	163	60	22.58	82	89	0.921348	3.58	2.84	0.68	0.94	1.51	11.8
1115	0	70	0	1	0	216	0	0	157	68	27.6	98.5	96.5	1.02073	5.9	7.04	1.58	1.87	4.29	9.1
1117	0	50	0	1	0	84	1	0	176	96	30.99	94	104	0.903846	2.59	6.52	1.8	1.14	4.19	7.9
1118	0	79	0	1	0	360	0	0	163	73	27.5	102	98	1.04082	3.62	6.14	2.13	1.43	3.74	7.5
1119	0	60	1	1	0	36	0	0	165	62.5	22.96			#DIV/0!	4.01	4.52	2.6	1.07	2.4	9.9
1120	0	68	1	1	0	12	1	1	170	61	21.11	75	95	0.789474	2.98	4.51	0.71	1.15	3.27	9.6
1121	0	79	1	1	0	12	0	0	160	60	23.44	91	93	0.978495	2.83	4.57	1.15	0.91	2.83	9.5
1122	0	58	0	1	0	120	1	1	176	64	20.66	82	94	0.87234	4.4	3.87	0.68	0.87	2.72	9.1
1123	0	84	0	1	0	240	1	1	160	64	25	77	88	0.875	2.37	3.2	1.07	1	2.1	10.6
1124	0	63	1	1	1	204	1	1	163	69.5	26.16	91	101	0.90099	5.14	11.39	13.61	0.88	2.81	6.7
1125	0	46	1	1	1	36	1	1	180	89	27.5	88	93	0.946237	4.35	6.15	1.25	1.44	3.76	8.5
1126	0	74	1	1	1	24	0	0	162	80	30.48	103	104	0.990385	5.94	2.91	2.12	1.02	1.36	7.4
1127	0	67	1	1	1	48	1	0	159	57.5	22.74	83	86	0.965116	4.06	3.87	1.96	0.79	2.19	8.7
1128	0	47	0	1	1	180	1	0	170	60	20.76	84	90	0.933333	4.47	4.24	1.06	1.15	2.63	8.2
1129	0	78	1	1	1	120	0	0	175	67	21.88	81	90	0.9	3.5	4.62	1.62	1.44	2.57	9.6
1130	0	74	1	1	1	48	1	1	164	51	18.96	69	83	0.831325	2.39	2.77	0.62	1.13	1.31	6.5
1131	1	68	1	1	0	120	0	0	156	43.5	17.9	75	80	0.9375	5.53	3.01	0.66	1.22	1.51	9.7
1132	1	73	1	1	0	180	0	0	152	56	24.24	92	90	1.02222	2.47	2.73	0.79	0.93	1.46	7.5
1133	1	68	0	1	0	120	0	0	148	55	25.11	92	96	0.958333	5.2	3.37	0.79	0.76	2.19	8.8
1134	1	54	1	1	1	96	0	0	153	55	23.5	84	92	0.913043	2.87	4.59	1.01	1.18	2.52	7.2
1135	1	71	1	1	1	300	0	0	148	42	19.17	80	87	0.91954	4.09	3.81	1.32	0.93	1.93	9.3
1136	1	78	0	1	0	60	0	0	153	65	27.77	98	104	0.942308	2.48	4.56	4.03	0.69	2.33	8.1
1137	1	48	0	1	0	72	1	1	153	48	20.5	88	93	0.946237	3.87	4.82	0.96	1.22	3.57	13.6
1138	1	68	1	1	0	144	0	0	158	68	27	105	110	0.954545	3.45	4.41	0.88	0.97	3.5	9.1
1139	1	64	1	1	0	120	0	0	161	58	22.38	82	87	0.942529	3.04	4.2	1.24	1.1	3.2	7.6
1140	1	53	1	1	0	84	0	0	153	58	24.7	81	94	0.861702	3.05	4.31	1.04	1.04	2.63	13.6
1141	1	63	1	1	0	240	0	0	154	48	20.24	96	96	1	2.67	4.57	1.31	1.32	2.42	6.4
1142	1	73	1	1	1	156	0	0	157	61	24.8	102	97	1.05155	2.12	6.51	1.87	0.91	4.24	11.7
1144	1	47	1	1	1	108	0	0	165	59	21.67	86	90	0.955556	5.68	3.76	4.76	0.61	2.22	9.4
1145	1	72	1	1	1	240	0	0	150	68	30.2	89	88	1.01136	3.42	3.98	2.37	0.93	2.05	12.8
1146	1	61	1	1	1	168	0	0	154	59.5	25.09	89	95	0.936842	4.11	4.3	2.21	0.89	2.5	9.7
1147	1	60	1	1	1	36	0	0	160	65	25.39	108	103	1.04854	2.29	4.74	1.83	1.66	2.2	10.8
1148	1	75	0	1	1	84	0	0	160	60	23.44	100	89	1.1236	3.37	4.4	1.8	1.28	3.3	13.3
1149	1	62	1	1	1	120	0	0	155	53	22.06	87	88	0.988636	3.24	3.69	1.78	1.58	1.7	6.6
1150	1	75	1	1	1	96	0	0	152	61	26.4	102	100	1.02	5.2	4.61	1.32	0.74	3.34	5.3
1152	1	46	1	1	1	120	0	0	164	55	20.45	76	88	0.863636	4.31	4.38	0.62	1.15	2.83	8.4
1153	1	57	1	1	1	60	0	0	156	58	23.83	86	87	0.988506	5.31	4.2	1.48	0.88	2.7	14.2
1154	1	61	0	1	1	240	0	0	160	72	28.13	77	86	0.895349	2.81	4.3	0.81	1.25	2.68	8.4
1155	1	61	1	1	1	84	0	0	169	75	26.26	88	96	0.916667	3.91	4.07	1.19	1.58	1.99	12.8
1157	1	70	1	1	1	240	1	1	153	61	26.06	96	101	0.950495	3.13	3.68	0.65	1.37	2.31	6.9
1158	1	53	1	1	1	120	0	0	156	50.5	20.75	75	90	0.833333	5	2.94	0.93	0.88	1.8	9.7
1159	0	71	0	1	0	96	0	0	158	67	26.84	100	98	1.02041	3.08	2.2	0.95	0.8	1.2	10.5
1160	0	76	1	1	1	120	0	0	153	68	29.05	103	96	1.07292	4.14	3.39	0.9	0.96	1.86	9
1161	0	75	1	1	1	240	0	0	168	68	24.11	101	104	0.971154	3.73	4.04	0.95	0.94	2.51	6.7
1162	0	49	1	1	1	120	0	0	164	57.5	21.38	78	91	0.857143	3.09	2.39	1.44	0.71	1.08	8.1
1163	0	71	0	1	0	120	0	0	169	66	23.1	94	104	0.903846	4.49	7.19	0.74	3.14	2.11	8.9
1165	0	68	1	1	0	240	1	1	169	66	23.11	92	97	0.948454	2.52	5.19	2.61	0.92	3.14	7.2
1167	0	60	1	1	1	60	1	1	150	40	17.78	73	86	0.848837	2.63	7.03	1.65	1.14	4.46	8.7
1168	0	73	1	1	1	180	0	0	165	77	28.28	101	104	0.971154	4.9	5.31	1.61	0.99	3.24	7.4
1169	0	70	0	1	1	240	1	0	160	60	23.44	106	98	1.08163	3.32	3.15	0.76	1.1	1.72	6.3
1171	1	56	0	1	1	2	0	0	159	51	20.17	85	87	0.977011	2.91	4.49	1.65	1.2	2.46	7.9
1172	1	81	1	1	0	1	0	0	159	54	21.36	84	95	0.884211	2.47	5.2	1.25	1.35	2.74	10.7
1173	1	74	0	1	0	156	0	0	155	51	21.23	88	96	0.916667	2.92	4.14	4.75	0.81	1.55	8.6
1174	1	79	1	1	0	60	0	0	148	47	21.46	92	93	0.989247	2.5	4.89	1.7	0.89	3.15	9
1175	1	68	1	1	1	1	0	0	157	56	23	85	85	1	10.9	6.49	5.16	0.8	2.92	11.5
1176	1	77	1	1	1	24	0	0	154	75	31.6	97	104	0.932692	3.65	5.98	4.69	1	3.37	8.9
1177	1	72	1	1	1	72	0	0	152	72	31.16	93	88	1.05682	2.95	5.82	1.42	1.21	3.77	7.8
1178	1	70	1	1	1	228	0	0	153	67	28.62	103	97	1.06186	2.76	5.66	1.05	2.26	2.77	9.9
1179	1	57	1	1	1	120	0	0	160	65	25.4	90	95	0.947368	4.88	5.39	1.78	1.1	3.55	11.5
1180	1	62	0	1	1	24	0	0	148	60	27.39	98	94	1.04255	4.68	5.3	1.12	1.3	3.7	8.8
1181	1	57	1	1	1	120	0	0	157	57.5	23.33			#DIV/0!	4.55	4.76	2.01	1.27	2.64	7.3
1182	1	69	1	1	1	240	0	0	160	63.5	24.8	88	93	0.946237	2.7	4.5	1.74	1.13	2.24	8.8
1183	1	64	1	1	1	36	0	0	147	48	22.21	80	90	0.888889	4.34	5.01	1.5	0.81	3.37	7.1
1184	1	61	1	1	1	120	0	0	153	59	25.2	75	90	0.833333	5.65	4.87	1.11	1.01	3.17	10.1
1185	1	54	1	1	1	48	0	0	150	55	24.44	87	87	1	5.51	4.78	1.33	0.83	3.06	7.9
1186	1	67	1	1	1	72	0	0	150	52	23.3	105	100	1.05	4.76	4.68	1.52	0.99	3.01	6.6
1187	1	51	0	1	1	60	0	0	157	58	23.53	105	107	0.981308	3.19	4.41	1.32	0.96	2.8	8.2
1188	1	82	1	1	1	120	0	0	152	56	24.24	80	92	0.869565	2.53	3.99	1.11	1.03	2.68	6.3
